# Perceptual difficulty modulates the direction of information flow in familiar face recognition

Hamid Karimi-Rouzbahani<sup>1\*</sup>, Farzad Remezani<sup>2</sup>, Alexandra Woolgar<sup>1,3</sup>, Anina Rich<sup>1</sup>,  
Masoud Ghodrati<sup>4\*</sup>

<sup>1</sup>Perception in Action Research Centre and Department of Cognitive Science Macquarie University, Australia

<sup>2</sup>Department of Computer Science, School of Mathematics, Statistics, and Computer Science, University of Tehran, Iran

<sup>3</sup>Medical Research Council Cognition and Brain Sciences Unit, University of Cambridge, UK

<sup>4</sup>Neuroscience Program, Biomedicine Discovery Institute, Monash University, Australia

\* to whom correspondence should be addressed.

## Abstract

Humans are fast and accurate when they recognize familiar faces. Previous neurophysiological studies have shown enhanced representations for the dichotomy of familiar vs. unfamiliar faces. As familiarity is a spectrum, however, any neural correlate should reflect graded representations for more vs. less familiar faces along the spectrum. By systematically varying familiarity across stimuli, we show a neural familiarity spectrum using electroencephalography. We then evaluated the spatiotemporal dynamics of familiar face recognition across the brain. Specifically, we developed a novel informational connectivity method to test whether peri-frontal brain areas contribute to familiar face recognition. Results showed that feed-forward flow dominates for the most familiar faces and top-down flow was only dominant when sensory evidence was insufficient to support face recognition. These results demonstrate that perceptual difficulty and the level of familiarity influence the neural representation of familiar faces and the degree to which peri-frontal neural networks contribute to familiar face recognition.

**Keywords:** Face Recognition, Familiar Faces, Multivariate Pattern Analysis (MVPA), Representational Similarity Analysis (RSA), Informational Brain Connectivity

## 29 Introduction

30 Faces are crucial for our social interactions, allowing us to extract information  
31 about identity, gender, age, familiarity, intent and emotion. Humans categorize familiar  
32 faces more quickly and accurately than unfamiliar ones, and this advantage is more  
33 pronounced under difficult viewing conditions, where categorizing unfamiliar faces often  
34 fails (Ramon and Gobbini, 2018; Young and Burton, 2018). The neural correlates of this  
35 behavioral advantage suggest an enhanced representation of familiar over unfamiliar  
36 faces in the brain (Dobs et al., 2019; Landi and Freiwald, 2017). Here, we focus on  
37 addressing two major questions about familiar face recognition. First, whether there is a  
38 “familiarity spectrum” for faces in the brain with enhanced representations for more vs.  
39 less familiar faces along the spectrum. Second, whether higher-order frontal brain areas  
40 contribute to familiar face recognition, as they do to object recognition (Bar et al., 2006;  
41 Summerfield et al., 2006; Goddard et al., 2016; Karimi-Rouzbahani et al., 2019), and  
42 whether levels of face familiarity and perceptual difficulty (as has been suggested  
43 previously (Woolgar et al., 2011; Woolgar et al., 2015)) impact the involvement of peri-  
44 frontal cognitive areas in familiar face recognition.

45 One of the main limitations of previous studies, which hinders our progress in  
46 answering our first question, is that they mostly used celebrity faces as the familiar  
47 category (Ambrus et al., 2019; Collins et al., 2018; Dobs et al., 2019). As familiar faces  
48 can range widely from celebrity faces to highly familiar ones such as family members,  
49 relatives, friends, and even one's own face (Ramon and Gobbini, 2018), these results  
50 might not reflect the full familiarity spectrum. A better understanding of familiar face  
51 recognition requires characterizing the computational steps and representations for sub-  
52 categories of familiar faces, including personally familiar, visually familiar, famous, and  
53 experimentally learned faces. Such face categories might not only differ in terms of their  
54 visual representations and their information coding, but also the availability of personal  
55 knowledge, relationships, and emotions associated with the identities in question (Ramon  
56 and Gobbini, 2018). These categories may, therefore, vary in terms of the potential for  
57 top-down influences in the process. Importantly, while a few functional magnetic  
58 resonance imaging (fMRI) studies have investigated the differences between different

59 levels of familiar faces (Gobbini et al., 2004; Landi and Freiwald, 2017; Leibenluft et al.,  
60 2004; Ramon et al., 2015; Sugiura et al., 2015; Taylor et al., 2009), there are no studies  
61 that systematically compare the temporal dynamics of *information processing* across this  
62 familiarity spectrum. Specifically, while event-related potential (ERP) analyses have  
63 shown amplitude modulation by levels of face familiarity (Henson et al., 2008; Kaufmann  
64 et al., 2009; Schweinberger et al., 2002; Huang et al., 2017), they remain silent about  
65 whether more familiar faces are represented better or worse than less familiar faces -  
66 amplitude modulation does not necessarily mean that information is being represented.  
67 To address this issue, we can use multivariate pattern analysis (MVPA or decoding;  
68 Amrus et al., 2019; Karimi-Rouzbahani et al., 2017a) to compare the amount of  
69 *information* in each of the familiarity levels.

70 In line with our second question, recent human studies have compared the neural  
71 dynamics for familiar versus unfamiliar face processing using the high temporal resolution  
72 of electroencephalography (EEG; Amrus et al., 2019; Collins et al., 2018) and  
73 magnetoencephalography (MEG; Dobs et al., 2019). These studies have found that  
74 familiarity affects the initial time windows of face processing in the brain, which are  
75 generally attributed to the feed-forward mechanisms of the brain. In particular, they have  
76 explored the possibility that the face familiarity effect occurs because these faces have  
77 been seen repeatedly, leading to the development of low-level representations for familiar  
78 faces in the occipito-temporal visual system. This in turn facilitates the flow of familiar face  
79 information in a bottom-up feed-forward manner from the occipito-temporal to the frontal  
80 areas for recognition (di Oleggio Castello and Gobbini, 2015; Ramon et al., 2015; Ellis et  
81 al., 1979; Young and Burton, 2018). On the other hand, studies have also shown the role  
82 of frontal brain areas in facilitating the processing of visual inputs (Bar et al., 2006;  
83 Kveraga et al., 2007; Goddard et al., 2016; Karimi-Rouzbahani et al., 2019), such as faces  
84 (Kramer et al., 2018; Summerfield et al., 2006), by feeding back signals to the face-  
85 selective areas in the occipito-temporal visual areas, particularly when the visual input is  
86 ambiguous (Summerfield et al., 2006) or during face imagery (Mechelli et al., 2004;  
87 Johnson et al., 2007). These top-down mechanisms, which were localized in medial  
88 frontal cortex, have been suggested (but not quantitatively supported) to reflect feedback  
89 of (pre-existing) face templates, against which the input faces are compared for correct

90 recognition (Summerfield et al., 2006). Despite the large literature of face recognition, the  
91 roles of the feed-forward (i.e. peri-occipital to peri-frontal) and feedback (i.e. peri-frontal  
92 to peri-occipital) brain mechanisms, and their possible temporal interactions, in familiar  
93 face recognition have remained ambiguous. We develop novel connectivity methods to  
94 track the flow of information along the feed-forward and feedback mechanisms and  
95 assess the role of these mechanisms in familiar face recognition.

96 One critical aspect of the studies that successfully detected top-down peri-frontal  
97 to peri-occipital feedback signals (Bar et al., 2006; Summerfield et al., 2006; Goddard et  
98 al., 2016) has been the *active* involvement of the participant in a task. In recent E/MEG  
99 studies reporting support for a feed-forward explanation of the face familiarity effect,  
100 participants were asked to detect target faces (Ambrus et al., 2019) or find a match  
101 between faces in series of consecutively presented faces (Dobs et al., 2019). This makes  
102 familiarity irrelevant to the task of the participant. Such indirect tasks may reduce the  
103 involvement of top-down familiarity-related feedback mechanisms, as was demonstrated  
104 by a recent study (Kay et al., 2017), which found reduced feedback signals (from  
105 intraparietal to ventro-temporal cortex) when comparing fixation versus an active task in  
106 an fMRI study. Therefore, to answer our first research question and fully test the  
107 contribution of feedback to the familiarity effect, we need active tasks that are affected by  
108 familiarity.

109 Timing information is also crucial in evaluating the flows of feed-forward and  
110 feedback information as these processes often differ in the temporal dynamics. With the  
111 advent of the concept of informational connectivity analysis, we now have the potential to  
112 examine the interaction of information between feed-forward and feedback mechanisms  
113 to characterize their potential spatiotemporal contribution to familiar face recognition  
114 (Goddard et al., 2016; Goddard et al., 2019; Anzellotti and Coutanche, 2018; Basti et al.,  
115 2020; Karimi-Rouzbahani et al., 2020). However, this requires novel methods to track the  
116 flow of familiarity information from a given brain area to a destination area and link this  
117 flow to the behavioural task goals to confirm its biological relevance. Such analyses can  
118 provide valuable insights for understanding the neural mechanisms underlying familiar  
119 face recognition in humans.

120 In our study, participants performed a familiar vs. unfamiliar face categorization  
121 task on sequences of images selected from four face categories (i.e., unfamiliar, famous,  
122 self, and personally familiar faces), with dynamically updating noise patterns, while their  
123 EEG data were recorded. By varying the signal-to-noise ratio of each image sequence  
124 using perceptual coherence, we were able to investigate how information for the different  
125 familiar categories gradually builds up in the electrical activity recordable by scalp  
126 electrodes, and how this relates to the amount of sensory evidence available in the  
127 stimulus (perceptual difficulty). The manipulation of sensory evidence also allowed us to  
128 investigate when, and how, feedback information flow affects familiar face recognition.  
129 Using univariate and multivariate pattern analyses, representational similarity analysis  
130 (RSA) and a novel informational connectivity analysis method, we reveal the temporal  
131 dynamics of neural representations for different levels of face familiarity.

132 Our results show that self and personally familiar faces lead to higher perceptual  
133 categorization accuracy and enhanced representation in the brain even when sensory  
134 information is limited while famous (visually familiar) and unfamiliar face categorization is  
135 only possible in high-coherence conditions. Importantly, our extension of information flow  
136 analysis reveals that in high-coherence conditions the feed-forward sweep of face  
137 category information processing is dominant, while at lower coherence levels the  
138 exchange of face category information is dominated by feedback. The change in  
139 dominance of feedback versus feed-forward effects as a function of coherence level  
140 supports a dynamic exchange of information between higher-order (frontal) cognitive and  
141 visual areas depending on the amount of sensory evidence.

142

## 143 Results

144 We designed a paradigm to study how the stimulus- and decision-related  
145 activations for different levels of face familiarity build up during stimulus presentation and  
146 how these built-up activations relate to the amount of sensory evidence about each  
147 category. We recorded EEG data from human participants (n=18) while they categorized

148 face images as familiar or unfamiliar. We varied the amount of sensory evidence by  
149 manipulating the phase coherence of images on different trials (Figure 1A). In each 1.2  
150 s (max) sequence of image presentation (trial), the pattern of noise changed in each frame  
151 (16.7 ms) while the face image and the overall coherence level remained the same.  
152 Familiar face images (120) were selected equally from celebrity faces, photos of the  
153 participants' own face, and personally familiar faces (e.g., friends, family members,  
154 relatives of the participant) while unfamiliar face images (120) were completely unknown  
155 to participants before the experiment. Within each block of trials, familiar and unfamiliar  
156 face images with different coherence levels were presented in random order.

157

## 158 Levels of face familiarity are reflected in behavioral performance

159 We quantified our behavioral results using accuracy and reaction times on correct  
160 trials. Specifically, accuracy was the percentage of images correctly categorized as either  
161 familiar or unfamiliar. All participants performed with high accuracy (>92%) at the highest  
162 phase coherence (55%), and their accuracy was much lower (~62%) at the lowest  
163 coherence (22%;  $F(3,272)=75.839$ ,  $p<0.001$ ; Figure 1B). The correct reaction times show  
164 that participants were faster to categorize the face at high phase coherence levels than  
165 lower ones ( $F(3,272)=65.797$ ,  $p<0.001$ , main effect; Figure 1C). We also calculated the  
166 accuracy and reaction times for the sub-categories of the familiar category separately (i.e.  
167 famous, personally familiar and self). Note that the task was two-alternative forced-choice  
168 between familiar vs. unfamiliar faces, so participants were not specifically asked to  
169 categorize the sub-categories. The calculated accuracy here is the percentage of correct  
170 responses within each of these familiar sub-categories. The results show a gradual  
171 increase in accuracy as a function of phase coherence and familiarity (Figure 1D, two-  
172 way ANOVA. factors: coherence level and face category. Face category main effect:  
173  $F(2,408)=188.708$ ,  $p<0.001$ , coherence main effect:  $F(3,408)=115.977$ ,  $p<0.001$ , and  
174 interaction:  $F(6,408)=12.979$ ,  $p<0.001$ ), with the highest accuracy in categorizing their  
175 own (self), then personally familiar, and finally famous (or visually familiar) faces. The  
176 reaction time analysis also showed a similar pattern where participants were fastest to

177 categorize self faces, then personally familiar and famous faces (Figure 1E, two-way  
178 ANOVA, factors: coherence level and face category. Face category main effect:  
179  $F(2,404)=174.063$ ,  $p<0.001$ , coherence main effect:  $F(3,404)= 104.861$ ,  $p<0.001$ , and  
180 interaction:  $F(6,404)=17.051$ ,  $p<0.001$ ). All reported p-values were corrected for multiple  
181 comparisons using Bonferroni correction.

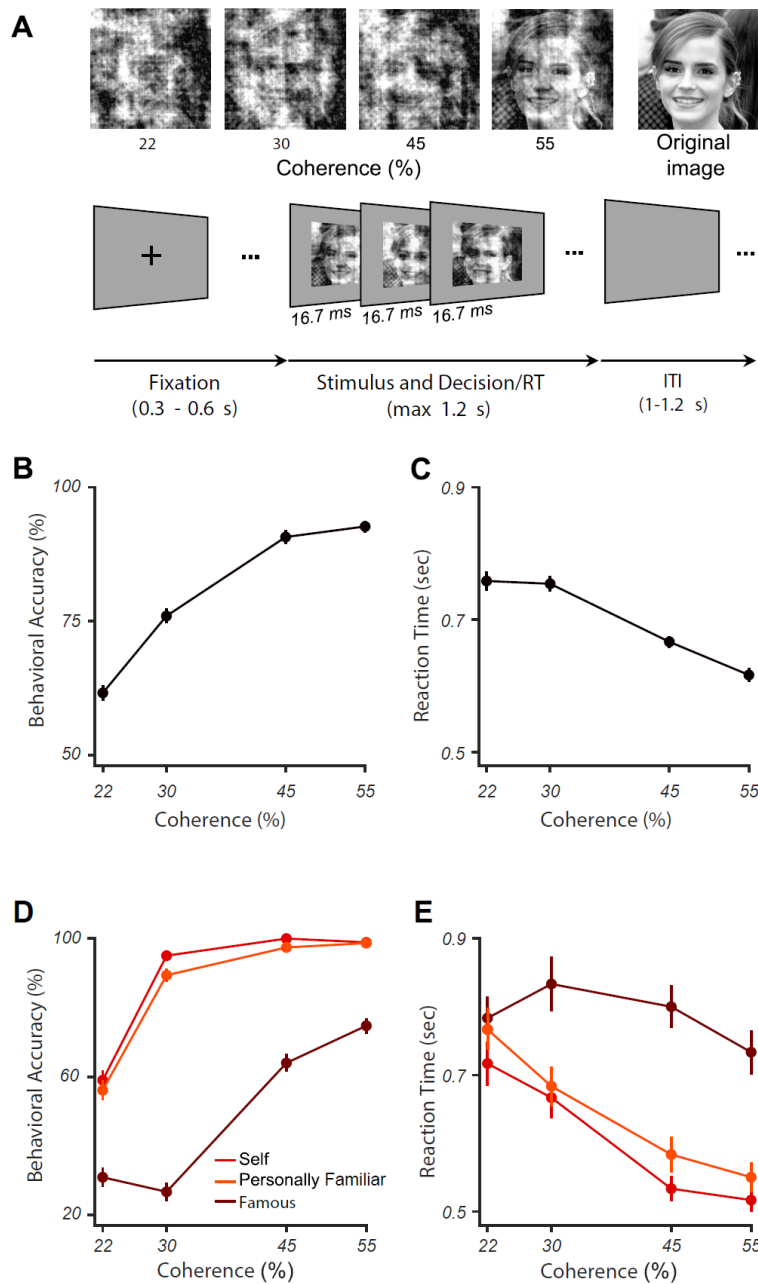

182

183 **Figure 1. Experimental design and behavioral results for familiar vs. unfamiliar face categorization.**

184 (A) Upper row shows a sample face image (from the famous category) at the four different phase coherence

185 levels (22, 30, 45, and 55%) used in this experiment, in addition to the original image (not used). Lower row  
186 shows schematic representation of the experimental paradigm. In each trial, a black fixation cross was  
187 presented for 300-600 ms (randomly selected). Then, a noisy and rapidly updating (every 16.7 ms) stimulus  
188 of a face image (unfamiliar, famous, personally familiar, or self), at one of the four possible phase coherence  
189 levels, was presented until response, for a maximum of 1.2 s. Participants had to categorize the stimulus  
190 as familiar or unfamiliar by pressing one of two buttons (button mappings swapped across the two sessions,  
191 counterbalanced across participants). There was then a variable intertrial interval (ITI) lasting between 1-  
192 1.2 s (chosen from a uniform random distribution; see a demo of the task here <https://osf.io/n7b8f/>). (B)  
193 Mean behavioral accuracy for face categorization across all stimuli, as a function of coherence levels; (C)  
194 Median reaction times for correctly categorized face trials across all conditions, as a function of coherence  
195 levels. (D) and (E) show the results for different familiar face sub-categories. Error bars in all panels are the  
196 standard error of the mean across participants.

## 197 Is there a “familiarity spectrum” for faces in the brain?

198 Our behavioral results showed that there is a graded increase in participants'  
199 performance as a function of familiarity level - i.e., participants achieve higher  
200 performance if the faces are more familiar to them. In this section we address the first  
201 question of this study about whether we can find a familiarity spectrum in neural  
202 activations, using both the traditional univariate and novel multi-variate analyses of EEG.

203

### 204 Event-related potentials reflect behavioral familiarity effects

205 As an initial, more traditional, pass at the data, we explored how the neural  
206 responses were modulated by different levels of familiarity and coherence by averaging  
207 event-related potentials (ERP) across participants for different familiarity levels and phase  
208 coherences (Figure 2B). This is important as recent work failed to capture familiar face  
209 identity information from single electrodes (Ambrus et al., 2019). At high coherence, the  
210 averaged ERPs, obtained from a representative centroparietal electrode (CP2), where  
211 previous studies have found differential activity for different familiarity levels (Henson et  
212 al., 2008; Kaufmann et al., 2009; Huang et al., 2017), demonstrated an early, evoked  
213 response, followed by an increase in the amplitude proportional to familiarity levels. This  
214 showed that self faces elicited the highest ERP amplitude, followed by personally familiar,  
215 famous, and unfamiliar faces (Figure 2B for 55% phase coherence). This observation of  
216 late differentiation between familiarity levels at later time points seems to support



217 evidence accumulation over time, which is more pronounced at higher coherence levels  
218 where the brain had access to reliable information.

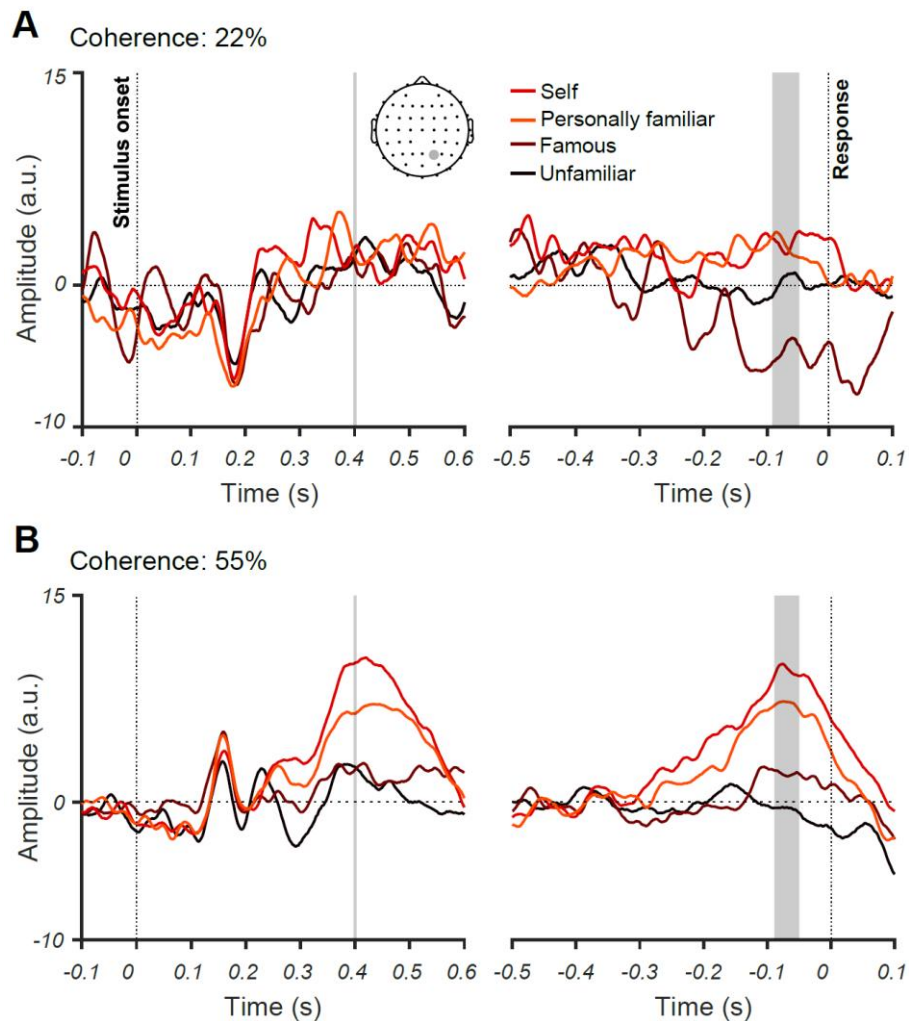

219

220 **Figure 2. The effect of familiarity and sensory evidence on event-related potentials (ERPs).** Averaged  
221 ERPs for 22% (A) and 55% (B) phase coherence levels and four face categories across all participants for  
222 an electrode at a centroparietal site (CP2). Note that the left panels show stimulus-aligned ERPs while the  
223 right panel shows response-aligned ERPs. Shaded areas show the time windows, when the absolute ERP  
224 differences between the four face categories were significantly ( $p < 0.05$ ) higher in the 55% vs. 22%  
225 coherence levels. The significance was evaluated using one-sided unpaired  $t$ -test with correction for  
226 multiple comparisons across time. The differences were significant at later stages of stimulus processing  
227 around 400 ms post-stimulus onset and <100 ms before the response was given by the participant in the  
228 stimulus- and response-aligned analyses, respectively.

229

230 We also observed a similar pattern between the ERPs of different familiarity levels  
231 at the time of decision (just before the response was made). Such systematic

232 differentiation across familiarity levels was lacking at the lowest coherence level, where  
233 the amount of sensory evidence, and behavioral performance, were low (c.f. Figure 2A  
234 for 22% phase coherence; shaded areas, evaluated using unpaired one-sided  $t$ -test  
235  $p < 0.05$ , Bonferroni-corrected for multiple comparisons across time). These results reveal  
236 the neural correlates of perceptual differences in categorizing different familiar face  
237 categories under perceptually difficult conditions.

238

## 239 Dynamics of neural representation and evidence accumulation for different 240 face familiarity levels

241 Our results so far are consistent with previous event-related studies showing that  
242 the amplitude of ERPs is modulated by the familiarity of the face (Henson et al., 2008;  
243 Kaufmann et al., 2009; Schweinberger et al., 2002; Huang et al., 2017). However, more  
244 modulation of ERP amplitude does not necessarily mean more information. To address  
245 this issue, we used multivariate pattern and representational similarity analyses on these  
246 EEG data to quantify the time course of familiar vs. unfamiliar face processing. Compared  
247 to traditional single-channel (univariate) ERP analysis, MVPA allows us to capture the  
248 whole-brain widespread and potentially subtle differences between the activation  
249 dynamics of different familiarity levels (Ambrus et al., 2019; Dobs et al., 2019).  
250 Specifically, we asked: (1) how the coding dynamics of stimulus- and response-related  
251 activities change depending on the level of face familiarity; and (2) how manipulation of  
252 sensory evidence (phase coherence) affects neural representation and coding of different  
253 familiarity levels.

254 To obtain the temporal evolution of familiarity information across time, at each time  
255 point we trained the classifier to discriminate between familiar and unfamiliar faces. Note  
256 that the mapping between response and fingers were swapped from the first session to  
257 the next (counterbalanced across participants) and the data were collapsed across the  
258 two sessions for these analyses, which ensures the motor response cannot drive the  
259 classifier. We trained the classifier using 90% of the trials and tested them on the left-out  
260 10% of data using a standard 10-fold cross-validation procedure (see *Methods*). This

261 analysis used only correct trials. Our decoding analysis showed that, up until ~200 ms  
262 after stimulus onset, decoding accuracy is near chance for all coherence levels (Figure  
263 3A). The decoding accuracy then gradually increases over time and peaks around 500  
264 ms post-stimulus for the highest coherence level (55%) but remains around chance for  
265 the lower coherence level (22%, Figure 3A). The accuracy for intermediate coherence  
266 levels (30% and 45%) falls between these two bounds but only reaches significance  
267 above chance for the 45% coherence level. This ramping up temporal profile suggests an  
268 accumulation of sensory evidence in the brain across the time course of stimulus  
269 presentation, which has a processing time that depends on the strength of the sensory  
270 evidence (Hanks and Summerfield, 2017; Philiastides et al., 2006).

271 To examine if neural responses can be decoded at finer categorization levels, we  
272 separately calculated the decoding accuracy for each of the familiar face sub-categories  
273 (after collapsing the data across all coherence levels and decoding familiar vs. unfamiliar  
274 trials as explained above): unfamiliar, famous, self and personally familiar faces (Figure  
275 3B). The decoding accuracy was highest for self faces, both for stimulus- and response-  
276 aligned analyses, followed by personally familiar, famous and unfamiliar faces. Accuracy  
277 for the response-aligned analysis shows that the decoding gradually increased to peak  
278 decoding ~100 ms before the response was given by participants. This temporal evolution  
279 of decoding accuracy begins after early visual perception and rises in proportion to the  
280 amount of the face familiarity.

281 Low-level stimulus differences between conditions could potentially drive the  
282 differences between categories observed in both ERP and decoding analyses (e.g.,  
283 familiar faces being more frontal than unfamiliar faces, leading to images with brighter  
284 centers and, therefore, separability of familiar from unfamiliar faces using central  
285 luminance of images; Dobs et al., 2019; Ambrus et al., 2019). To address such potential  
286 differences, we carried out a supplementary analysis using RSA (Supplementary  
287 Materials), which showed that any such differences between images could not drive the  
288 differentiation between categories.

289

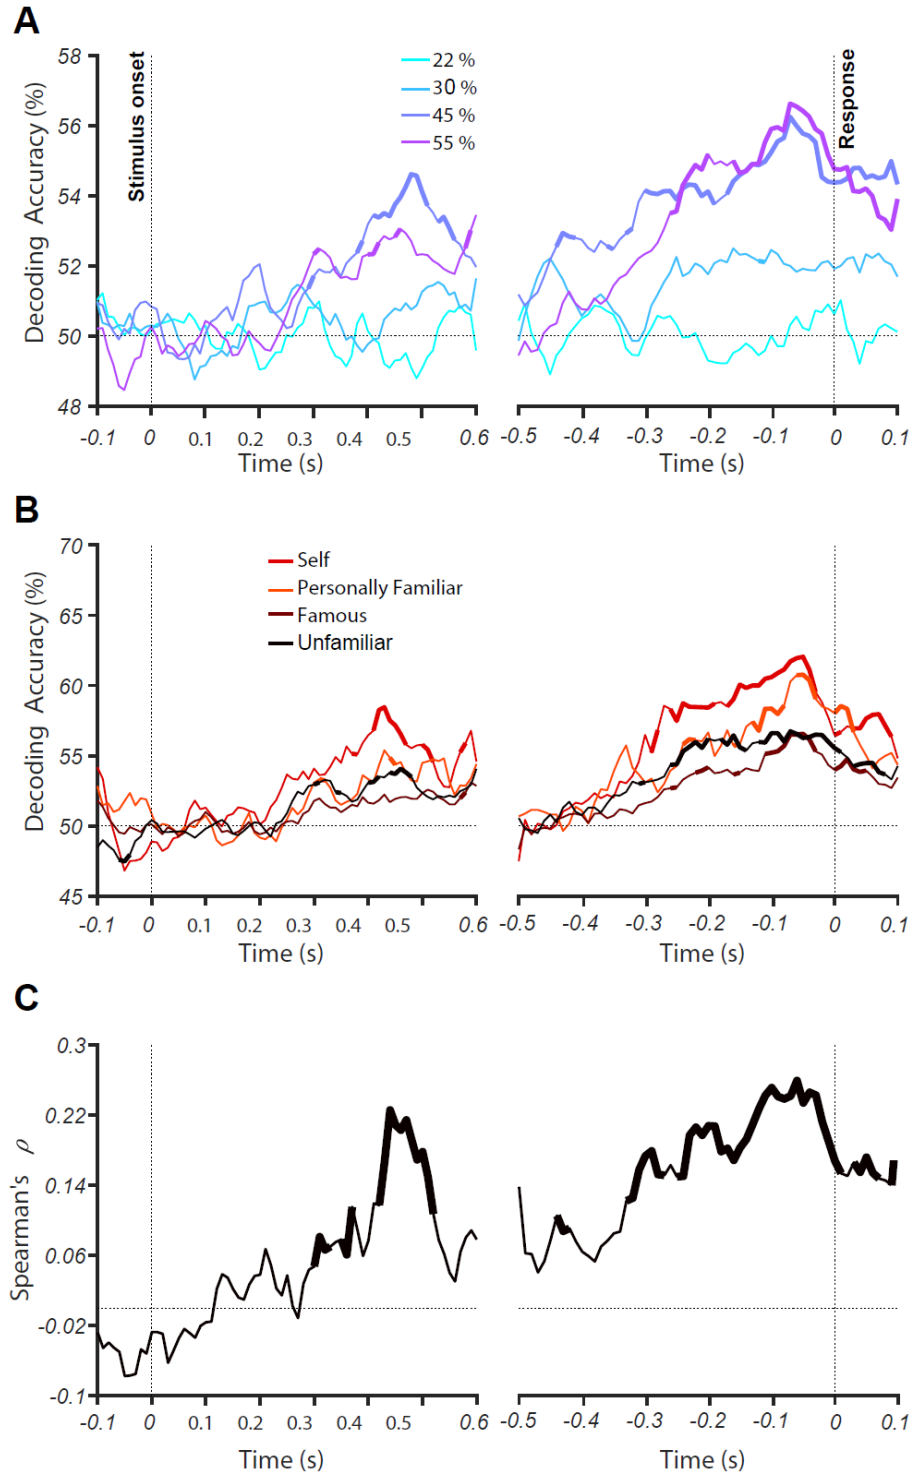

290

291 **Figure 3. Decoding of face familiarity from EEG signals.** (A) Time course of decoding accuracy for  
292 familiar versus unfamiliar faces from EEG signals for four different phase coherence levels (22%, 30%,  
293 45%, and 55%). (B) Time course of decoding accuracy for four face categories (i.e., unfamiliar, famous,  
294 self and personally familiar faces) from EEG signals collapsed over phase coherence levels. The chance  
295 accuracy is 50%. Thickened lines indicate the time points when the accuracy was significantly above  
296 chance level (sign rank test, FDR corrected across time,  $p < 0.05$ ). (C) Correlation between behavioral

297 performance and decoding accuracy (across all conditions) over time. Thickened lines indicate the time  
298 points when the correlation was significant. The left panels show the results for stimulus-aligned analysis  
299 while the right panels show the results for response-aligned analysis (averaged over 18 participants).

300

301 To determine whether the dynamics of decoding during stimulus presentation are  
302 associated with the perceptual task, as captured by our participants' behavioral  
303 performance, we calculated the correlation between decoding accuracy and perceptual  
304 performance. For this, we calculated the correlation between 16 data points from  
305 decoding accuracy (4 face categories \* 4 phase coherence levels) and their  
306 corresponding behavioral accuracy rates, collapsed over participants. The correlation  
307 peaked ~500 ms post-stimulus (Figure 3C), which was just before the response was  
308 given. This is consistent with an evidence accumulation mechanism determining whether  
309 to press the button for 'familiar' or 'unfamiliar', which took another ~100 ms to turn into  
310 action (finger movement).

311

## 312 Do higher-order peri-frontal brain areas contribute to familiar face 313 recognition?

314 In this section we address the second question of this study about whether peri-  
315 frontal brain areas contribute to the recognition of familiar faces in the human brain using  
316 a novel model-based connectivity analyses on EEG.

317

## 318 Task difficulty and familiarity level affect information flow across the brain

319 We investigated how the dynamics of feed-forward and feedback information flow  
320 changes during the accumulation of sensory evidence and the evolution over a trial of  
321 neural representations of face images. We developed a novel connectivity method based  
322 on RSA to quantify the relationships between the evolution of information based on peri-  
323 occipital EEG electrodes and those of the peri-frontal electrodes. As an advantage to

324 previous Granger causality methods (Goddard et al., 2016; Goddard et al., 2019; Karimi-  
325 Rouzbahani et al., 2019), the connectivity method developed here allowed us to check  
326 whether the transferred signals contained *specific aspects of stimulus information*.  
327 Alternatively, it could be the case that the transferred signals might carry highly abstract  
328 but irrelevant information between the source and destination areas, which can be  
329 incorrectly interpreted as connectivity (Anzellotti and Coutanche, 2018; Basti et al., 2020).  
330 Briefly, feed-forward information flow is quantified as the degree to which the information  
331 from peri-occipital electrodes contributes to the information recorded at peri-frontal  
332 electrodes at a later time point, which reflects moving the frontal representation closer to  
333 that required for task goals. Feedback flow is defined as the opposite: the contribution to  
334 information at peri-frontal electrodes to that recorded later at peri-occipital electrodes  
335 (Figure 4A).

336 The results show that at the highest coherence level (55%), information flow is  
337 dominantly in the feed-forward direction. This is illustrated by the shaded area in Figure  
338 4B where partialling out the peri-frontal from peri-occipital correlations only marginally  
339 reduces the total peri-occipital correlation (Figure 4B, black curves and shaded area),  
340 meaning that there is limited information transformation from peri-frontal to peri-occipital.  
341 In contrast, partialling out the peri-occipital from peri-frontal correlations leads to a  
342 significant reduction in peri-frontal correlation, reflecting a feed-forward exchange of  
343 information (Figure 4B, brown curves and shaded area). This trend is also seen for  
344 response-aligned analysis.

345 These differences are shown more clearly in Figure 4C where the peaks of feed-forward  
346 and feedback curves show that the feed-forward information is dominant earlier, followed  
347 by feedback information flow, as shown by the later peak of feedback dynamics. These  
348 results suggest that when the sensory evidence is high, feed-forward information flow  
349 may be sufficient for categorical representation and decision making while feedback only  
350 slightly enhances the representation. However, in lower coherence levels (i.e., low  
351 sensory evidence), the strength of information flow is either equivalent between feed-  
352 forward and feedback directions (30%, 45%) or dominantly feedback (22%, Figure 4D).

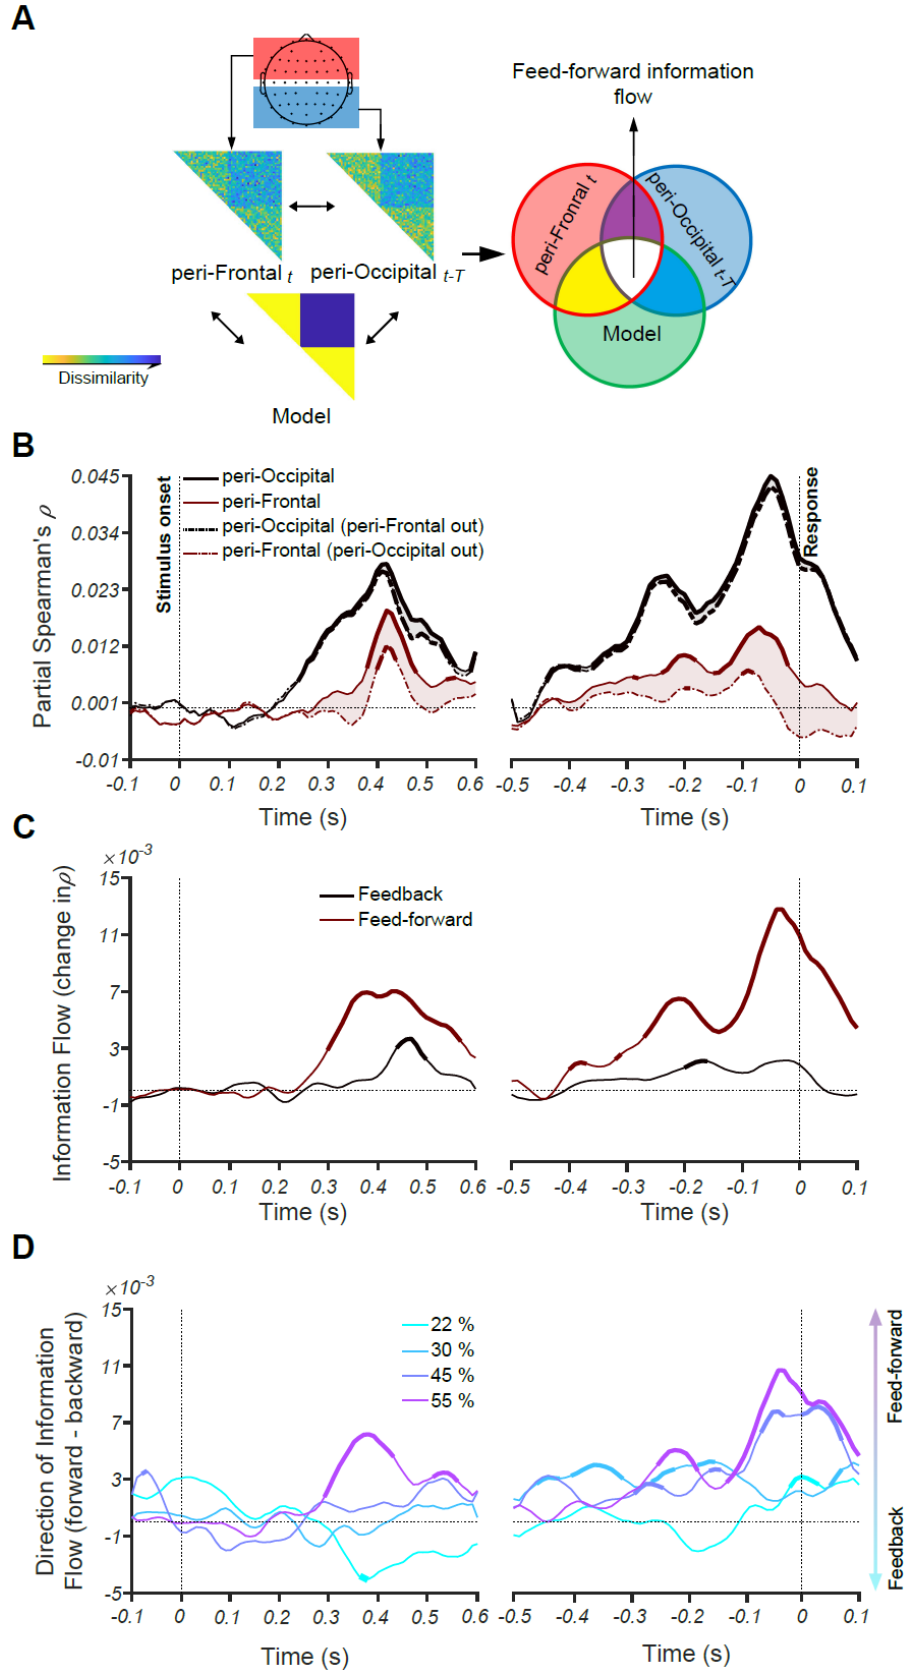

354 **Figure 4. Feed-forward and feedback information flow revealed by RSA. (A)** A schematic presentation  
355 of the method for calculating informational connectivity between the peri-frontal and peri-occipital  
356 electrodes, termed feed-forward and feedback information flow. Feed-forward information flow is calculated  
357 as the correlation between the *present* peri-frontal neural RDM and the predicted model RDM minus the  
358 same correlation when the *earlier* peri-occipital neural RDM is partialled out from it. **(B)** Time course of  
359 partial Spearman's correlations representing the partial correlations between the peri-occipital (black) and  
360 peri-frontal (brown) EEG electrodes and the model (see the inset in A) while including (solid) and excluding  
361 (dashed) the effect of the other area at phase coherence of 55%. The shaded area shows the decline in  
362 partial correlation of the current area with the model after excluding (partialling out) the RDM of the other  
363 area. Note that in both the dashed and solid lines, the low-level image statistics are partialled out of the  
364 correlations, so we call them partial correlations in both cases. **(C)** Feedforward (brown) and feedback  
365 (black) information flows obtained by calculating the value of the shaded areas in the corresponding curves  
366 in B. **(D)** Direction of information flow for different coherence levels, determined as the difference between  
367 feed-forward and feedback information flow showed in C. Thickened lines indicate time points at which the  
368 difference is significantly different from zero (sign permutation test and corrected significance level at  
369  $p < 0.05$ ), and black dotted lines indicate 0 correlation. The left panels show the results for stimulus-aligned  
370 analysis while the right panels represent the results for response-aligned analysis.

371

372 Here, we can see that the lower sensory evidence correlates with greater  
373 engagement of feedback mechanisms, suggesting that feedback is recruited to boost  
374 task-relevant information in sensory areas under circumstances where the input is weak.  
375 Therefore, the dynamics and relative contribution of feedback and feed-forward  
376 mechanisms in the brain appear to vary with the sensory evidence / perceptual difficulty  
377 of the task.

378 Importantly, we also were interested in knowing whether the degree of familiarity  
379 changes the direction of information flow between the peri-frontal and peri-occipital brain  
380 areas. For this analysis, we collapsed the data across all coherence levels as we were  
381 interested in the impact of face familiarity on information flow. Accordingly, we generated  
382 a wide range of RDM models, which allowed us to evaluate how much information about  
383 each subcategory of familiar faces (i.e., famous, personally familiar and self), levels of  
384 familiar faces, all familiar faces as a group, and unfamiliar faces were transferred between  
385 the two brain areas (Figure 5). As the results show, when the data were aligned to  
386 stimulus onset, self, familiar and familiarity level models showed the highest amount of  
387 feed-forward flow of information starting to accumulate after the stimulus onset, reaching  
388 sustained significance ~500 ms. However, less familiar categories did not reach  
389 significance. In the response-aligned analysis, again, the significant time points show the  
390 domination of feed-forward flow for the self, familiar and familiarity level models. Together,



391 these results suggest that while the information about the unfamiliar category could not  
392 evoke the domination of information in any directions, the representations of familiar,  
393 familiarity levels and self faces showed dominant feed-forward information flows from the  
394 peri-occipital to the peri-frontal brain areas. Note that, in this analysis, we also tried to  
395 minimize the effect of the participant's decision and motor response in the models by  
396 excluding the opposing category (i.e. unfamiliar category when evaluating the familiar  
397 models and *vice versa*), which potentially contributed to the information flows in the  
398 previous analysis.

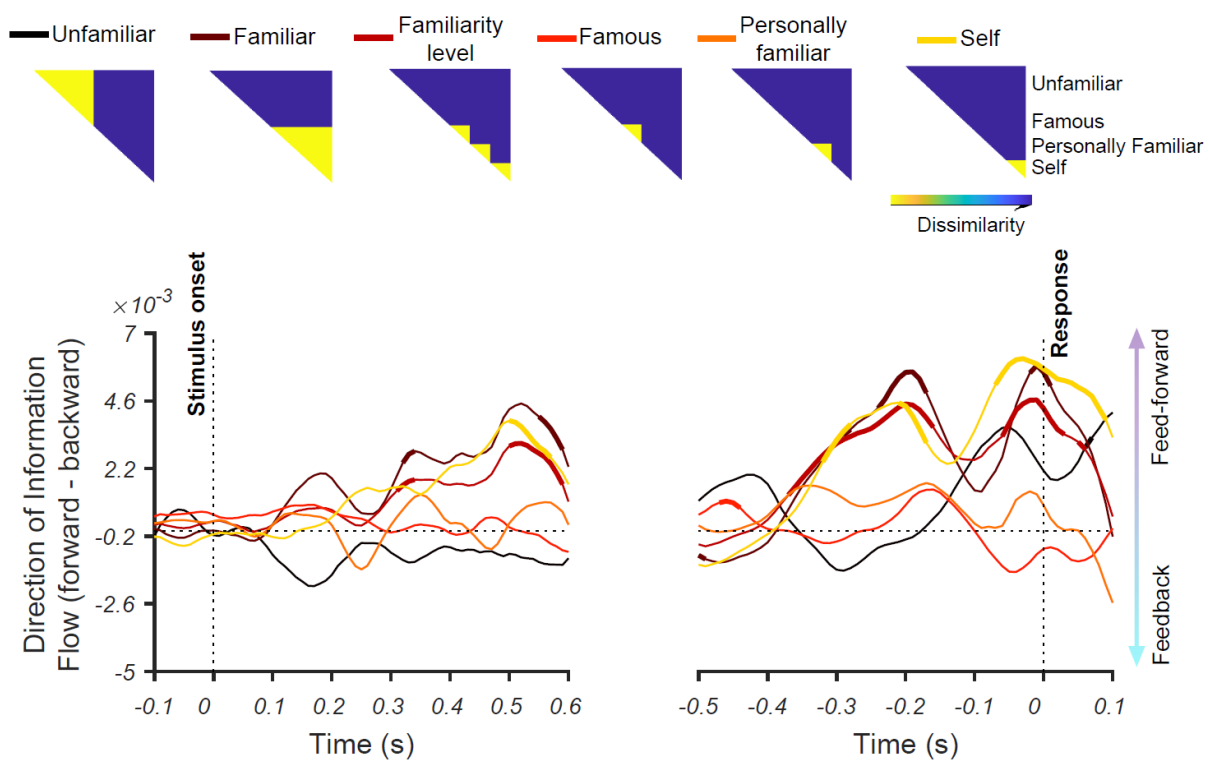

399

400 **Figure 5. Directions of information flow for different familiarity levels using their corresponding**  
401 **RDM models.** The models, as depicted on the top, are constructed to measure the extent and timing by  
402 which information about unfamiliar, familiar, familiarity levels and each familiar sub-category moves  
403 between the peri-occipital and peri-frontal brain areas. The yellow areas in the models refer to the target  
404 category (including unfamiliar, famous, self and personally familiar faces). Thickened lines indicate time  
405 points at which the difference is significantly different from zero (sign permutation test and corrected for  
406 multiple comparisons at significance level of  $p < 0.05$ ), and black horizontal dotted lines indicate 0  
407 correlation. The left panel shows the result for stimulus-aligned analysis while the right panels represent  
408 the result for response-aligned analysis.

409

410           Altogether, the results of the information connectivity analysis suggest that, in  
411 familiar face recognition, both top-down and bottom-up mechanisms play a role, with the  
412 amount of sensory evidence determining their relative contribution. It also suggests that  
413 the degree to which sensory information is processed feed-forward can be modulated by  
414 the familiarity level of the stimulus.

415

## 416 Discussion

417           This study investigated the neural mechanisms of familiar face recognition. We  
418 asked how perceptual difficulty and levels of familiarity affected the contribution of feed-  
419 forward and feedback processes in face processing. We first showed that manipulating  
420 the familiarity affected the informational content of neural responses about face category,  
421 in line with a large body of behavioral literature showing an advantage of familiar over  
422 unfamiliar face processing in the brain. Then, we developed a novel extension to  
423 informational connectivity analyses to track the exchange of familiarity information  
424 between peri-occipital and peri-frontal brain regions to see if frontal brain areas contribute  
425 to familiar face recognition. Our results showed that when the perceptual difficulty was  
426 low (high sensory evidence), the categorical face information was predominantly  
427 streamed through feed-forward mechanisms. On the other hand, when the perceptual  
428 difficulty was high (low sensory evidence), the dominant flow of face familiarity information  
429 reversed, indicating reliance on feedback mechanisms. Moreover, when teasing apart the  
430 effect of task and response from neural representations, only the familiar faces, but not  
431 the unfamiliar faces, showed the domination of feed-forward flow of information, with  
432 maximum flow for the most familiar category, the self faces.

433           Our results are consistent with the literature suggesting that visual perception  
434 comprises both feed-forward and feedback neural mechanisms transferring information  
435 between the peri-occipital visual areas and the peri-frontal higher-order cognitive areas  
436 (Bar et al., 2006; Summerfield et al., 2006; Goddard et al., 2016; Karimi-Rouzbahani et  
437 al., 2017b; Karimi-Rouzbahani et al., 2017c; Karimi-Rouzbahani et al., 2019). However,

438 previous experimental paradigms and analyses did not dissociate feedback and feed-  
439 forward information flow in familiar face recognition, and argued for a dominance of feed-  
440 forward processing (Dobs et al., 2019; di Oleggio Castello and Gobbini, 2015; Ellis et al.,  
441 1979; Young and Burton, 2018). The more nuanced view we present is important because  
442 stimulus familiarity, similar to other factors including levels of categorization  
443 (superordinate vs. basic level; Besson et al., 2017; Praß et al., 2013), task difficulty (Chen  
444 et al., 2008; Woolgar et al., 2015; Kay et al., 2017) and perceptual difficulty (Fan et al.,  
445 2020; Hupe et al., 1998; Gilbert and Li, 2013; Gilbert and Sigman, 2007; Lamme and  
446 Roelfsema, 2000; Woolgar et al., 2011), may affect the complex interplay of feed-forward  
447 and feedback mechanisms in the brain. Our results showed that the contribution of peri-  
448 frontal to peri-occipital feedback information was inversely proportional to the amount of  
449 sensory evidence about the stimulus. Specifically, we only observed feedback when the  
450 sensory evidence was lowest (high perceptual difficulty) in our face familiarity  
451 categorization task. Although a large literature has provided evidence for the role of top-  
452 down feedback in visual perception, especially when sensory visual information is low,  
453 they generally evaluated the feedback mechanisms within the visual system (Ress et al.,  
454 2000; Lamme and Roelfsema, 2000; Super et al., 2001; Lamme et al., 2002; Pratte et al.,  
455 2013; Fenske et al., 2006; Lee and Mumford, 2003; Felleman et al., 1991; Delorme et  
456 al., 2004; Mohsenzadeh et al., 2018; Kietzmann et al., 2019) rather than across the fronto-  
457 occipital brain networks (Bar et al., 2006; Summerfield et al., 2006; Goddard et al., 2016;  
458 Karimi-Rouzbahani et al., 2018; Karimi-Rouzbahani et al., 2019). Our findings support  
459 theories suggesting that fronto-occipital information transfer may feedback (pre-existing)  
460 face templates, against which the input faces are compared for correct recognition (Bar  
461 et al., 2006; Summerfield et al., 2006). As an advantage to the previous results, which  
462 could not determine the content of the transferred signals (Bar et al., 2006; Summerfield  
463 et al., 2006; Goddard et al., 2016; Karimi-Rouzbahani et al., 2018; Karimi-Rouzbahani et  
464 al., 2019), using our novel connectivity analyses, we showed that the transferred signal  
465 contained information which contributed to the categorization of familiar and unfamiliar  
466 faces.

467           Despite methodological differences, our findings support previous human studies  
468 showing increased activity in lower visual areas when the cognitive and perceptual tasks

469 were difficult relative to easy, which the authors attributed to top-down contributions (Ress  
470 et al., 2000; Kay et al., 2017). However, due to the low temporal resolution of fMRI, these  
471 studies cannot show the temporal evolution of these top-down contributions or the validity  
472 of the hypothesized direction. Importantly, the observed increase in activity in lower visual  
473 areas does not necessarily correspond to the enhancement of neural representations in  
474 those areas - increased univariate signal does not show whether there is better / more  
475 information that will support performance. Electrophysiological studies in animals have  
476 also shown that cortical feedback projections robustly modulate responses of early visual  
477 areas when sensory evidence is low, or the stimulus is difficult to segregate from the  
478 background figure (Hupe et al., 1998). A recent study has also found cortical feedback  
479 modulated the activity of neurons in the dorsolateral geniculate nucleus (dLGN), which  
480 was less consistent when presenting simple vs. complex grating stimuli (Spacek et al.,  
481 2019). Therefore, varying perceptual difficulty seems to engage different networks and  
482 processing mechanisms, and we show here that this also pertains to faces: less difficult  
483 stimuli such as our high-coherence faces seem to be predominantly processed by the  
484 feed-forward mechanisms, while more difficult stimuli such as our low-coherence faces  
485 recruit both feed-forward and feedback mechanisms. However, the exact location of the  
486 feedback in all these studies, including ours, remains to be determined with the  
487 development of more accurate modalities for neural activity recording.

488 We observed that the direction of information flow is influenced by the familiarity  
489 of the stimulus. The models of familiar faces, familiarity levels and self faces, evoked a  
490 dominant flow of feed-forward information. The unfamiliar category, however, did not  
491 evoke information flow in any direction, as evaluated by our connectivity method. This is  
492 consistent with enhanced representations of familiar face categories in the feed-forward  
493 pathways (Dobs et al., 2019; di Oleggio Castello and Gobbini, 2015; Ellis et al., 1979;  
494 Young and Burton, 2018), which, in turn, requires less top-down contributions to facilitate  
495 the perception of relevant information (Bar et al., 2006; Gilbert and Sigman, 2007). Our  
496 results might initially seem inconsistent with Fan et al. 's (2020) study, which did not report  
497 significant differences between the temporal dynamics of familiar and unfamiliar face  
498 representations; however, they only used famous faces within the familiar face spectrum.  
499 In our sub-category analysis, we also did not observe differences between famous faces

500 and unfamiliar faces; our main findings were from highly familiar self faces. Overall, then,  
501 our results suggest that processing of familiar faces, especially the most familiar (self)  
502 faces, is dominated by feed-forward information flow.

503 Results also show that, in lower coherence levels, the information about the  
504 familiarity levels was generally stronger than the information about familiarity itself (as  
505 captured by familiar-unfamiliar model RDM; Supplementary Figure 1). This suggests a  
506 lower threshold for the appearance of familiarity level compared to familiar-unfamiliar  
507 representations, which are differentially developed through life-time experience and task  
508 instructions, respectively. Specifically, development of neural representations reflecting  
509 familiarity levels could be a result of exposure to repetitive faces, which can lead to  
510 developing face-specific representations in the visual system (Dobs et al., 2019), while  
511 task instructions could temporarily enhance the processing of relevant information in the  
512 brain through top-down mechanisms (Hebart et al., 2018; Karimi-Rouzbahani et al.,  
513 2019). That is probably the reason for the dominance of feed-forward and feedback  
514 information flows in the processing of familiarity levels and familiar-unfamiliar information,  
515 respectively (Figure 5).

516 The RSA-based connectivity method used in this study further develops a recent  
517 shift towards multivariate brain connectivity methods (Anzellotti and Coutanche, 2018;  
518 Basti et al., 2020; Keitzmann et al., 2019; Goddard et al., 2016; Clarke et al., 2018; Karimi-  
519 Rouzbahani, 2018; Karimi-Rouzbahani et al., 2019; Karimi-Rouzbahani et al., 2020), and  
520 introduces several advantages over previous methods of connectivity analyses.  
521 Traditional connectivity methods examine inter-area interactions through indirect  
522 measures such as gamma-band synchronization (Gregoriou et al., 2009), shifting power  
523 (Bar et al., 2006) or causality in the activity patterns (Summerfield et al., 2006; Fan et al.,  
524 2020). Such connectivity methods consider simultaneous (or time-shifted) correlated  
525 activations of different brain areas as connectivity, but they are unable to examine how (if  
526 at all) relevant *information* is transferred across those areas. Goddard et al. (2016)  
527 developed an RSA-based connectivity method to solve these issues, which allowed us  
528 and others to track the millisecond transfer of stimulus information across peri-frontal and  
529 peri-occipital brain areas (Karimi-Rouzbahani, 2018; Karimi-Rouzbahani et al., 2019;

530 Goddard et al., 2019; Keitzmann et al., 2019). This method, however, has the limitation  
531 that, it cannot tell us *what* aspects of the representation are transferred and modulated.  
532 In other words, we need new methods to tell how (if at all) the transferred information is  
533 contributing to the representations in the destination area. Alternatively, we might find  
534 aspects of information which correlate the information in the source area and are  
535 observed in the destination of area with some delay, but do not show any contribution to  
536 the behavioural goals. To address this issue, Clarke et al., (2018), proposed an RSA-  
537 based informational connectivity method which incorporated RDM models, such as the  
538 ones that we used here, to track specific aspects of the transferred information. However,  
539 their method did not show the temporal dynamics of information flow across brain areas.  
540 Our novel connectivity analysis method allowed us, for the first time, to explicitly  
541 determine the *content*, the *direction* and the *temporal evolution* of the information  
542 transferred from the peri-frontal to peri-occipital areas and *vice versa*. The relevance of  
543 the transferred information is determined by the amount that the representations in the  
544 destination area are shifted towards our predefined predicted RDM models. In this way,  
545 we could determine the temporal dynamics of the contributory element of the transferred  
546 information. This informational connectivity method can be used to address questions  
547 about information exchange using a variety of multivariate brain imaging modalities. Note  
548 that, although the spatiotemporal flow of information observed in this study was obtained  
549 from familiar/unfamiliar face recognition data, a similar approach can be adopted to study  
550 the flow of information across a wide set of tasks, such as object recognition, target  
551 detection and image matching.

552 Our results specify the neural correlates for the behavioral advantage in  
553 recognizing more vs. less familiar faces in a “familiarity spectrum”. As in previous studies,  
554 our participants were better able to categorize highly familiar than famous or unfamiliar  
555 faces, especially in low-coherence conditions (Kramer et al., 2018; Young and Burton,  
556 2018). This behavioral advantage could result from long-term exposure to variations of  
557 personally familiar faces under different lighting conditions and perspectives, which is  
558 usually not the case for famous faces. Our neural decoding results quantified a neural  
559 representational advantage for more familiar faces compared to less familiar ones (i.e.  
560 higher decoding for the former than the latter) to suggest that more familiar faces lead to

561 more distinguishable neural representations as well. Decoding accuracy was also  
562 proportional to the amount of sensory evidence: the higher the coherence levels, the  
563 higher the decoding accuracy. We observed that the decoding accuracy “ramped-up” and  
564 reached its maximum ~100 ms before participants expressed their decisions using a key  
565 press. These results are suggestive of sensory evidence accumulation and decision  
566 making processes during face processing in humans, consistent with previously reported  
567 data in monkey and recent single-trial ERP studies (Kelly et al., 2013; Hanks and  
568 Summerfield, 2017; Philiastides et al., 2006; Philiastides and Sajda, 2006; Shadlen and  
569 Newsome, 2001). The significant correlation between MVPA and our behavioral results,  
570 moreover, showed a direct relationship between neural representation and behavioral  
571 outcomes with regard to familiar face processing. This means that the behavioral  
572 advantages of self faces and the condition with the highest sensory evidence (highest  
573 coherence) could have been driven by the enhanced neural representations in those  
574 conditions.

575         The time courses of our EEG results showed their maximum effects after 400 ms  
576 post-stimulus onset, which makes our results incomparable to the previous studies, as  
577 these generally show face familiarity modulation during early ERP components such as  
578 N170, N250, and P300 (Dobs et al., 2019; Ambrus, 2019; Fan et al., 2020; Henson et al.,  
579 2008; Kaufmann et al., 2009; Schweinberger et al., 2002; Huang et al., 2017). Typically,  
580 these studies use event-related paradigms, which evoke initial brain activations peaking  
581 at around 200 ms, whereas our dynamic masking paradigm releases the information  
582 gradually along the time course of the trial. Moreover, the extended (>200ms) static  
583 stimulation used in previous studies has been suggested to bias towards domination of  
584 feed-forward processing (Goddard et al., 2016; Karimi-Rouzbahani, 2018), because of  
585 the co-processing of the incoming sensory information and the recurrence of earlier  
586 windows of the same input (Kietzmann et al., 2019; Mohsenzadeh et al., 2018), making  
587 it hard to measure feedback. However, our paradigm, while providing a delayed  
588 processing profile compared to previous studies, avoids this and also slows down the  
589 process of evidence accumulation so that it becomes more trackable in time.

590 In conclusion, our study demonstrates that the processing of face information  
591 involves both feed-forward and feedback flow of information in the brain, and which  
592 predominates depends on the strength of incoming perceptual evidence and the  
593 familiarity of the face stimulus. Our novel extension of multivariate connectivity analysis  
594 methods allowed us to disentangle feed-forward and feedback contributions to familiarity  
595 representation. This connectivity method can be applied to study a wide range of cognitive  
596 processes, wherever information is represented in the brain and transferred across areas.  
597 We also showed that the behavioral advantage for familiar face processing is robustly  
598 reflected in neural representations of familiar faces in the brain and can be quantified  
599 using multivariate pattern analyses. These new findings and methods emphasise the  
600 importance of, and open new avenues for, exploring the impact of different behavioral  
601 tasks on the dynamic exchange of information in the brain.

602

## 603 Materials and Methods

### 604 Participants

605 We recorded from 18 participants (15 male, aged between 20-26 years, all with  
606 normal or corrected-to-normal vision). Participants were students from the Faculty of  
607 Mathematics and Computer Science at the University of Tehran, Iran. All participants  
608 voluntarily participated in the experiments and gave their written consent prior to  
609 participation. All experimental protocols were approved by the ethical committee of the  
610 University of Tehran. All experiments were carried out in accordance with the guidelines  
611 of the Declaration of Helsinki.

612



## 613 Stimuli

614 We presented face images of four categories, including unfamiliar, famous, self  
615 and personally familiar faces. The unfamiliar faces (n=120) were unknown to participants.  
616 The famous faces (n=40) were pictures of celebrities, politicians, and other well-known  
617 people. These faces were selected from different, publicly available face databases<sup>1</sup>. In  
618 both categories, half of the images were female, and half were male. To ensure that all  
619 participants knew the famous face identities, participants completed a screening task prior  
620 to the study. In this screening, we presented them with the names of famous people in  
621 our data set and asked if they were familiar with the person.

622 The personally familiar faces were selected from participants' family, close  
623 relatives, and friends (n=40); self-images were photographs of participants (n=40). The  
624 images of self and personally familiar faces were selected to have varied backgrounds  
625 and appearances. On average, we collected n=45 for personally familiar and n=45 for self  
626 faces for every individual participant. All images were cropped to have 400×400 pixels  
627 and were converted to greyscale (Figure 1A). We ensured that spatial frequency,  
628 luminance, and contrast were equalized across all images. The magnitude spectrum of  
629 each image was adjusted to the average magnitude spectrum of all images in our  
630 database <sup>2</sup>.

631 The phase spectrum was manipulated to generate noisy images characterized by  
632 their percentage phase coherence (Dakin et al., 2002). We used a total of four different  
633 phase coherence values (22%, 30%, 45%, and 55%), chosen based on behavioral pilot  
634 experiments, so overall behavioral performance spanned the psychophysical dynamic  
635 range. Specifically, the participants scored 52.1%, 64.7%, 85.2% and 98.7% in the  
636 mentioned coherence levels in the piloting. At each of the four phase coherence levels,

<sup>1</sup> <http://mmlab.ie.cuhk.edu.hk/projects/CelebA.html>  
<https://megapixels.cc/datasets/msceleb/>

<sup>2</sup> [https://github.com/Masoud-Ghodrati/face\\_familiarity](https://github.com/Masoud-Ghodrati/face_familiarity)

637 we generated multiple frames for every image: the number of frames generated  
638 depended on the reaction time of the participants, as explained below.

639

## 640 EEG acquisition and Apparatus

641 We recorded EEG data from participants while they were performing the face  
642 categorization task. EEG data were acquired in an electrostatically shielded room using  
643 an ANT Neuro Amplifier (eego 64 EE-225) from 64 Ag/AgCl scalp electrodes and from  
644 three periocular electrodes placed below the left eye and at the left and right outer canthi.  
645 All channels were referenced to the left mastoid with input impedance <15k and chin  
646 ground. Data were sampled at 1000 Hz and a software-based 0.1-200 Hz bandpass filter  
647 was used to remove DC drifts, and high-frequency noise and 50 and 100 Hz (harmonic)  
648 notch filters were applied to minimize line noise. These filters were applied non-causally  
649 (using MATLAB filtfilt) to avoid phase-related distortions. We used Independent  
650 Component Analysis (ICA) to remove artefactual components in the signal. The  
651 components which were reflecting artefactual signals (eye movements, head  
652 movements) were removed based on ADJUST's criteria (Mognon et al., 2011). Next, trials  
653 with strong eye movement or other movement artifacts were removed using visual  
654 inspection. On average, we kept  $98.74\% \pm 1.5\%$  artifact-free trials for any given condition.

655 We presented images on LCD monitor (BenQ XL2430, 24", 144 Hz refresh rate,  
656 resolution of 1920 × 1080 pixels) and the stimulus presentation was controlled using  
657 custom-designed MATLAB codes and Psychtoolbox 3.0 (Brainard, 1997; Pelli, 1997). We  
658 presented stimuli at a distance of 60 cm to the participant, and each image subtended  $8^\circ$   
659 ×  $8^\circ$  of visual angle.

660

## 661 Procedure

662 Participants performed a familiar vs. unfamiliar face categorization task by  
663 categorizing dynamically updating sequences of either familiar or unfamiliar face images  
664 in two recording sessions (Figure 1A). Image sequences were presented in rapid serial  
665 visual presentation (RSVP) fashion at a frame rate of 60 Hz frames per second (i.e., 16.67  
666 ms per frame without gaps). Each trial consisted of a single sequence of up to 1.2 seconds  
667 (until response) with a series of images from the same stimulus (i.e., selection from either  
668 familiar or unfamiliar face categories) at one of the four possible phase coherence levels.  
669 Importantly, within each phase coherence level, the overall amount of noise remained  
670 unchanged, whereas the spatial distribution of the noise varied across individual frames  
671 such that different parts of the underlying image was revealed sequentially. If stimuli are  
672 presented statically for more than ~200ms, this would result in a dominant feed-forward  
673 flow of information simply due to the incoming information (Goddard et al., 2016; Karimi-  
674 Rouzbahani, 2019; Lamme et al., 2000). On the other hand, if we present stimuli for very  
675 brief durations (e.g. < 50 ms), there may be insufficient time to evoke familiarity  
676 processing.

677 We instructed participants to fixate at the center of the monitor and respond as  
678 accurately and quickly as possible by pressing one of two keyboard keys (left and right  
679 arrow keys) to identify the image as familiar or unfamiliar using the right index and middle  
680 fingers, respectively. The mapping between familiar-unfamiliar categories and the two  
681 fingers were swapped from the first session to the next (counterbalanced across  
682 participants) and the data were collapsed across the two sessions before analyses. As  
683 soon as a response was given, the RSVP sequence stopped, followed by an inter-trial  
684 interval of 1–1.2 s (random with uniform distribution). The maximum time for the RSVP  
685 sequence was 1.2 secs. If participants failed to respond within the 1.2 secs period, the  
686 trial was marked as a no-choice trial and was excluded from further analysis. We had a  
687 total of 240 trials (i.e., 30 trials per perceptual category, familiar and unfamiliar, each at  
688 four phase coherence levels) during the experiment. We presented six blocks of 36 trials  
689 each, and one block of 24 trials and participants had some resting time between the

690 blocks. Each image from the image set was presented to the participants once in each  
691 session.

692

## 693 Analysis

### 694 Decoding (MVPA) analysis

695 We decoded the information content of our conditions using Multivariate Pattern  
696 Analysis (MVPA) methods with Support Vector Machine (SVM) classifiers (Cortes et al.,  
697 1995). MVPA utilizes within-condition similarity of trials and their cross-condition  
698 dissimilarity to determine the information content of individual conditions. We trained an  
699 SVM classifier on the patterns of brain activity (from 64 EEG electrodes) from 90% of  
700 familiar (including personally familiar, famous, and self categories) and 90% of unfamiliar  
701 trials, and then tested the trained classifier on the left-out 10% of trials from each category.  
702 The classification accuracy from categorization of the testing data shows whether there  
703 is information about familiarity in the neural signal. We only used the trials in which the  
704 participant *correctly* categorized the stimulus as familiar or unfamiliar. We repeated this  
705 procedure iteratively 10 times until all trials from the two categories were used in the  
706 testing of the classifier once (no trial was included both in the training and testing sets in  
707 a single run), hence 10-fold cross-validation, and averaged the classification accuracy  
708 across the 10 validation runs. To obtain the decoding accuracy through time, we down-  
709 sampled the EEG signals to 100 Hz and repeated the same classification procedure for  
710 every 10 ms time point from -100 to 600 ms relative to the onset of the stimulus, and from  
711 -500 to 100 ms relative to the response. This allowed us to assess the evolution of face  
712 familiarity information relative to the stimulus onset and response separately.

713 To investigate the potential differences in the temporal evolution of the sub-  
714 categories contained in the familiar category (i.e., famous, personally familiar and self),  
715 we additionally calculated the decoding accuracy for each sub-category separately. Note  
716 that the same decoding results obtained from decoding of familiar vs. unfamiliar

717 categories were used here, only calculated separately for each sub-category of familiar  
718 faces.

719 We used random bootstrapping testing to evaluate the significance of the decoding  
720 values at every time point. This involved randomizing the labels of the familiar and  
721 unfamiliar trials 10,000 times and obtaining 10,000 decoding values using the above  
722 procedure. The  $p$ -values of the true decoding values were obtained as  $[1 - p(\text{randomly}$   
723  $\text{generated decoding values which were surpassed by the corresponding true decoding}$   
724  $\text{value})]$ . We then corrected the  $p$  values for multiple comparisons across time (using  
725 MATLAB's `mafdr` function). After the correction, the true decoding values with  $p < 0.05$   
726 were considered significantly above chance (e.g., 50%).

727

## 728 Brain-behavior correlation

729 To investigate if the decoding results could explain the observed behavioral face  
730 categorization results, we calculated the correlation between the decoding and the  
731 behavioral results using Spearman's rank correlation. We calculated the correlation  
732 between a 16-element vector containing the percentage correct behavioral responses for  
733 the four coherence levels of the four familiarity levels (i.e. Familiar, Famous, Self and  
734 Unfamiliar), and another vector with the same structure containing the decoding values  
735 from the same conditions at every time point separately. Please note that here we  
736 calculated the percentage correct for familiar and unfamiliar sub-categories in contrast to  
737 what we did when plotting the behavioral accuracy for the whole experiment in Figure 1B.  
738 To determine the significance of the correlations, the same bootstrapping procedure as  
739 described above was repeated at every time point by generating 10,000 random  
740 correlations after shuffling the elements of the behavioral vector. The true correlations  
741 were compared with the randomly generated correlations and deemed significant if their  
742  $p$ -values (as computed above) were  $< 0.05$  after correction for multiple comparisons.

743

## 744 Representational similarity analysis

745         Representational similarity analysis is used here for three purposes. First, to partial  
746 out the possible contributions of low-level image statistics to our decoding results, which  
747 is not directly possible in the decoding analysis (Supplementary Materials). Second, to  
748 investigate possible coding strategies that the brain might have adopted which could  
749 explain our decoding, specifically, whether the brain was coding familiar versus unfamiliar  
750 faces, the different levels of familiarity or a combination of the superordinate and  
751 subordinate categories. Third, to measure the contribution of information from other brain  
752 areas to the representations of each given area (see Information flow analysis).

753         We constructed neural representational dissimilarity matrices (RDMs) by  
754 calculating the (*Spearman's* rank) correlation between every possible representation  
755 obtained from every single presented image leading to a 240 by 240 RDM matrix. The  
756 matrices were constructed using signals from the electrodes over the whole brain as well  
757 as from peri-occipital and peri-frontal electrodes separately as explained later (Figures 4-  
758 6). We also constructed *image* RDMs for which we calculated the correlations between  
759 every possible pair of images which had generated the corresponding neural  
760 representations used in the neural RDMs. Finally, to evaluate how much the neural RDMs  
761 coded the familiar vs. unfamiliar faces and/or different familiarity levels, we constructed  
762 two models RDMs. In the *Familiar-Unfamiliar* model RDM, the elements which  
763 corresponded to the correlations of familiar with familiar, or unfamiliar with unfamiliar,  
764 representations (and not their cross-correlations) were valued as 1, and the elements  
765 which corresponded to the cross-correlations between familiar and unfamiliar faces were  
766 valued as 0. The *Familiarity level* model, on the other hand, was filled with 0s (instead of  
767 1s) for the representations which corresponded to the cross-correlations between  
768 different sub-categories of familiar faces (e.g. personally familiar vs. famous) with  
769 everything else being the same as the *Familiar-Unfamiliar* model RDM. To correlate the  
770 RDMs, we selected and reshaped the upper triangular elements of the RDMs (excluding  
771 the diagonal elements) into vectors called 'RDV'. To evaluate the correlation between the  
772 neural RDVs and the model RDVs, we used *Spearman's* partial correlation in which we

773 calculated the correlation between the neural and the model RDV while partialling out the  
774 image RDV as in equation (1):

775

$$776 \quad \partial correlation(t) = \rho_{RDV_{Neural}(t)RDV_{Model} \cdot RDV_{Image}} \quad (1)$$

777

778 As indicated in the equation, the partial correlation was calculated for every time  
779 point of the neural data (10 ms time steps), relative to the stimulus onset and response  
780 separately using the time-invariant model and image RDVs. To evaluate the significance  
781 of the partial correlations, we used a similar bootstrapping procedure as was used in  
782 decoding. However, here we randomized the elements of the model RDV 10,000 times  
783 (while keeping the number of ones and zeros equal to the original RDV) and calculated  
784 10,000 random partial correlations. Finally, we compared the true partial correlation at  
785 every time point with the randomly generated partial correlations for the same time point  
786 and deemed it significant if it exceeded 95% of the random correlations ( $p < 0.05$ ) after  
787 correcting for multiple comparisons.

788

## 789 Informational connectivity analysis

790 We developed a novel model-based method of information flow analysis to  
791 investigate how earlier information content of other brain areas contributes to the present-  
792 time information content of a given area. While several recent approaches have  
793 suggested for information flow analysis in the brain (Goddard et al., 2016; Karimi-  
794 Rouzbahani, 2018; Karimi-Rouzbahani et al., 2019), following the recent needs for these  
795 approaches in answering neuroscience questions (Anzellotti and Coutanche, 2018), none  
796 of the previously developed methods could answer the question of whether the  
797 transferred information was improving the representation of the target area in line with the  
798 behavioral task demands. Our proposed model, however, explicitly incorporates the  
799 specific aspects of behavioral goals or stimuli in its formulation and allows us to measure

800 if the representations of target areas are shifted towards the behavioural/neural goals by  
801 the received information. An alternative would be that the incoming information from other  
802 areas are just epiphenomenal and are task-irrelevant. This new method can distinguish  
803 these alternatives.

804 Accordingly, we split the EEG electrodes in two groups, each with 16 electrodes:  
805 peri-frontal and peri-occipital (Figure 4A) to see how familiarity information is (if at all)  
806 transferred between these areas that can be broadly categorized as “cognitive” and  
807 “sensory” brain areas, respectively. We calculated the neural RDVs for each area  
808 separately and calculated the correlation between the neural RDV and the model RDV,  
809 partialling out the image RDM from the correlation (as explained in equation (1)). This  
810 resulted in a curve when calculating the partial correlation at every time point in 10 ms  
811 intervals (see the solid lines in Figure 4B). Note that the partial correlation curve for the  
812 peri-frontal area could have received contributions from the present and earlier  
813 representations of the same area (i.e., the latter being imposed by our sequential stimulus  
814 presentation). It could also have received contributions from earlier peri-occipital  
815 representations through information flow from peri-occipital to the peri-frontal area. To  
816 measure this potential contribution, we partialled out the earlier peri-occipital  
817 representations in calculation of the partial correlation between peri-frontal and model  
818 RDVs according to equation (2):

819

$$820 \text{ Peri – frontal } \partial \text{ correlation}(t) = \\ 821 \rho_{RDV_{Neural}(frontal, t) RDV_{Model} \cdot \{RDV_{Image}, RDV_{Neural}(occipital, t - T)\}}. \quad (2)$$

822

823 where  $NeuralRDV(frontal, t)$  refers to the peri-frontal neural RDV at present and  
824  $NeuralRDV(occipital, t - T)$  refers to the peri-occipital neural RDV in an earlier time  
825 point. We then calculated the difference between the original partial correlation at the  
826 peri-frontal areas and the partial correlation calculated using equation (2) to determine  
827 the contribution of earlier peri-occipital representations we called this “contribution of



828 information feed-forward flow” (as indicated by the brown shades in Figure 4). To  
829 determine the contribution of the peri-frontal representations in moving the peri-occipital  
830 representations, we used equation (3):

831

$$832 \text{ Peri - occipital } \partial \text{ correlation}(t) = \\ 833 \rho_{RDV_{Neural}(occipital, t) RDV_{Model} \cdot \{RDV_{Image}, RDV_{Neural}(frontal, t - T)\}}. \quad (3)$$

834 with the same notations as in equation (2). Accordingly, to determine the  
835 contribution of earlier peri-frontal representations in directing the peri-occipital  
836 representations towards the model RDV, namely 'contribution of information feedback  
837 flow', we calculated the difference between the original partial correlation at the peri-  
838 occipital areas (using equation (1)) and the partial correlation calculated using equation  
839 (3). In equations (1) and (2), the delay time (T) was considered 50 ms and the earlier  
840 representations were averaged in a 50 ms time window (including 5 RDVs obtained from  
841 5 steps of 10ms intervals), according to the previously reported delay times between the  
842 peri-occipital and peri-frontal areas in visual processing (Fuxe and Simpson, 2002,  
843 Karimi-Rouzbahani et al., 2019).

844 Finally, to characterize the information flow dynamics between the peri-occipital  
845 and peri-frontal areas, we calculated the difference between the feed-forward and  
846 feedback contribution of information flows. This allowed us to investigate the transaction  
847 of targeted information between the brain areas aligned to the stimulus onset and  
848 response. We repeated the same procedure using the Familiar-Unfamiliar as well as  
849 Familiarity level models to see if they differed. We determined the significance of the  
850 partial correlations using the above-explained random bootstrapping procedure. We  
851 determined the significance of the differences between partial correlations (the shaded  
852 areas in Figure 4 and the lines in panel C) and the differences in the feed-forward and  
853 feedback contribution of information using Wilcoxon's signed-rank test using  $p < 0.05$   
854 threshold for significance after correction for multiple comparisons (using Matlab mafdr).

855

## 856 Acknowledgements

857 We would like to thank Ali Yoonessi for supporting our electroencephalography data  
858 collection in his lab. We would also like to appreciate Chris I Baker and Mark Williams for  
859 revising the manuscript and providing their valuable feedback on this study.

860

## 861 References

- 862 Ambrus, Géza Gergely, Daniel Kaiser, Radoslaw Martin Cichy, and Gyula Kovács.  
863 2019. “The Neural Dynamics of Familiar Face Recognition.” *Cerebral Cortex* 29 (11):  
864 4775–4784.
- 865 Anzellotti, Stefano, and Marc N. Coutanche. 2018. “Beyond Functional Connectivity:  
866 Investigating Networks of Multivariate Representations.” *Trends in Cognitive Sciences*  
867 22 (3): 258–269.
- 868 Bar, Moshe, Karim S. Kassam, Avniel Singh Ghuman, Jasmine Boshyan, Annette M.  
869 Schmid, Anders M. Dale, Matti S. Hämäläinen, Ksenija Marinkovic, Daniel L. Schacter,  
870 and Bruce R. Rosen. 2006. “Top-down Facilitation of Visual Recognition.” *Proceedings*  
871 *of the National Academy of Sciences* 103 (2): 449–454.
- 872 Basti, Alessio, Hamed Nili, Olaf Hauk, Laura Marzetti, and Richard Henson. 2020.  
873 “Multivariate Connectivity: A Conceptual and Mathematical Review.” *Neuroimage*  
874 117179.
- 875 Besson, Gabriel, Gladys Barragan-Jason, Simon J. Thorpe, Michèle Fabre-Thorpe,  
876 Sébastien Puma, Mathieu Ceccaldi, and Emmanuel J. Barbeau. 2017. “From Face  
877 Processing to Face Recognition: Comparing Three Different Processing Levels.”  
878 *Cognition* 158: 33–43.
- 879 Brainard, David H. 1997. “The Psychophysics Toolbox.” *Spatial Vision* 10 (4): 433–436.

- 880 Chen, Yao, Susana Martinez-Conde, Stephen L. Macknik, Yulia Bereshpolova, Harvey  
881 A. Swadlow, and Jose-Manuel Alonso. 2008. "Task Difficulty Modulates the Activity of  
882 Specific Neuronal Populations in Primary Visual Cortex." *Nature Neuroscience* 11 (8):  
883 974.
- 884 Clarke, Alex, Barry J. Devereux, and Lorraine K. Tyler. 2018. "Oscillatory Dynamics of  
885 Perceptual to Conceptual Transformations in the Ventral Visual Pathway." *Journal of*  
886 *Cognitive Neuroscience* 30 (11): 1590–1605.
- 887 Collins, Elliot, Amanda K. Robinson, and Marlene Behrmann. 2018. "Distinct Neural  
888 Processes for the Perception of Familiar versus Unfamiliar Faces along the Visual  
889 Hierarchy Revealed by EEG." *NeuroImage* 181: 120–131.
- 890 Dakin, S. C., R. F. Hess, T. Ledgeway, and R. L. Achtman. 2002. "What Causes Non-  
891 Monotonic Tuning of fMRI Response to Noisy Images?" *Current Biology* 12 (14):  
892 R476–R477.
- 893 Delorme, Arnaud, Guillaume A. Rousselet, Marc J.-M. Macé, and Michele Fabre-  
894 Thorpe. 2004. "Interaction of Top-down and Bottom-up Processing in the Fast Visual  
895 Analysis of Natural Scenes." *Cognitive Brain Research* 19 (2): 103–113.
- 896 Dobs, Katharina, Leyla Isik, Dimitrios Pantazis, and Nancy Kanwisher. 2019. "How Face  
897 Perception Unfolds over Time." *Nature Communications* 10 (1): 1–10.
- 898 Ellis, Hadyn D., John W. Shepherd, and Graham M. Davies. 1979. "Identification of  
899 Familiar and Unfamiliar Faces from Internal and External Features: Some Implications  
900 for Theories of Face Recognition." *Perception* 8 (4): 431–439.
- 901 Fan, Xiaoxu, Fan Wang, Hanyu Shao, Peng Zhang, and Sheng He. 2020. "The Bottom-  
902 up and Top-down Processing of Faces in the Human Occipitotemporal Cortex." *ELife* 9:  
903 e48764.
- 904 Felleman, Daniel J., and DC Essen Van. 1991. "Distributed Hierarchical Processing in  
905 the Primate Cerebral Cortex." *Cerebral Cortex (New York, NY: 1991)* 1 (1): 1–47.

- 906 Fenske, Mark J., Elissa Aminoff, Nurit Gronau, and Moshe Bar. 2006. “Top-down  
907 Facilitation of Visual Object Recognition: Object-Based and Context-Based  
908 Contributions.” *Progress in Brain Research* 155: 3–21.
- 909 Foxe, John J., and Gregory V. Simpson. 2002. “Flow of Activation from V1 to Frontal  
910 Cortex in Humans.” *Experimental Brain Research* 142 (1): 139–150.
- 911 Gilbert, Charles D., and Mariano Sigman. 2007. “Brain States: Top-down Influences in  
912 Sensory Processing.” *Neuron* 54 (5): 677–696.
- 913 Gilbert, Charles D., and Wu Li. 2013. “Top-down Influences on Visual Processing.”  
914 *Nature Reviews Neuroscience* 14 (5): 350–363.
- 915 Gobbini, M. Ida, Ellen Leibenluft, Neil Santiago, and James V. Haxby. 2004. “Social and  
916 Emotional Attachment in the Neural Representation of Faces.” *Neuroimage* 22 (4):  
917 1628–1635.
- 918 Goddard, Erin, Thomas A. Carlson, and Alexandra Woolgar. 2019. “Spatial and  
919 Feature-Selective Attention Have Distinct Effects on Population-Level Tuning.” *BioRxiv*,  
920 530352.
- 921 Goddard, Erin, Thomas A. Carlson, Nadene Dermody, and Alexandra Woolgar. 2016.  
922 “Representational Dynamics of Object Recognition: Feedforward and Feedback  
923 Information Flows.” *Neuroimage* 128: 385–397.
- 924 Gregoriou, Georgia G., Stephen J. Gotts, Huihui Zhou, and Robert Desimone. 2009.  
925 “High-Frequency, Long-Range Coupling between Prefrontal and Visual Cortex during  
926 Attention.” *Science* 324 (5931): 1207–1210.
- 927 Hanks, Timothy D., and Christopher Summerfield. 2017. “Perceptual Decision Making in  
928 Rodents, Monkeys, and Humans.” *Neuron* 93 (1): 15–31.
- 929 Hebart, Martin N., Brett B. Bankson, Assaf Harel, Chris I. Baker, and Radoslaw M.  
930 Cichy. 2018. “The representational dynamics of task and object processing in humans.”  
931 *Elife* 7: e32816.

- 932 Henson, Richard N., Elias Mouchlianitis, William J. Matthews, and Sid Kouider. 2008.  
933 “Electrophysiological Correlates of Masked Face Priming.” *Neuroimage* 40 (2): 884–  
934 895.
- 935 Huang, Wanyi, Xia Wu, Liping Hu, Lei Wang, Yulong Ding, and Zhe Qu. 2017.  
936 “Revisiting the Earliest Electrophysiological Correlate of Familiar Face Recognition.”  
937 *International Journal of Psychophysiology* 120: 42–53.
- 938 Hupé, J. M., A. C. James, B. R. Payne, S. G. Lomber, P. Girard, and J. Bullier. 1998.  
939 “Cortical Feedback Improves Discrimination between Figure and Background by V1, V2  
940 and V3 Neurons.” *Nature* 394 (6695): 784–787.
- 941 Johnson, Matthew R., Karen J. Mitchell, Carol L. Raye, Mark D’Esposito, and Marcia K.  
942 Johnson. 2007. “A Brief Thought Can Modulate Activity in Extrastriate Visual Areas:  
943 Top-down Effects of Refreshing Just-Seen Visual Stimuli.” *Neuroimage* 37 (1): 290–  
944 299.
- 945 Karimi-Rouzbahani, Hamid, Alexandra Woolgar, and Anina N. Rich. 2020. “Neural  
946 signatures of vigilance decrements predict behavioural errors before they occur.”  
947 *bioRxiv*.
- 948 Karimi-Rouzbahani, Hamid, Ehsan Vahab, Reza Ebrahimpour, and Mohammad Bagher  
949 Menhaj. 2019. “Spatiotemporal Analysis of Category and Target-Related Information  
950 Processing in the Brain during Object Detection.” *Behavioural Brain Research* 362:  
951 224–239.
- 952 Karimi-Rouzbahani, Hamid, Nasour Bagheri, and Reza Ebrahimpour. 2017a. “Average  
953 activity, but not variability, is the dominant factor in the representation of object  
954 categories in the brain.” *Neuroscience* 346: 14–28.
- 955 Karimi-Rouzbahani, Hamid, Nasour Bagheri, and Reza Ebrahimpour. 2017b. “Hard-  
956 Wired Feed-Forward Visual Mechanisms of the Brain Compensate for Affine Variations  
957 in Object Recognition.” *Neuroscience* 349: 48–63.

- 958 Karimi-Rouzbahani, Hamid, Nasour Bagheri, and Reza Ebrahimpour. 2017c. “Invariant  
959 Object Recognition Is a Personalized Selection of Invariant Features in Humans, Not  
960 Simply Explained by Hierarchical Feed-Forward Vision Models.” *Scientific Reports* 7 (1):  
961 1–24.
- 962 Karimi-Rouzbahani, Hamid. 2018. “Three-Stage Processing of Category and Variation  
963 Information by Entangled Interactive Mechanisms of Peri-Occipital and Peri-Frontal  
964 Cortices.” *Scientific Reports* 8 (1): 1–22.
- 965 Kaufmann, Jürgen M., Stefan R. Schweinberger, and A. Mike Burton. 2009. “N250 ERP  
966 Correlates of the Acquisition of Face Representations across Different Images.” *Journal*  
967 *of Cognitive Neuroscience* 21 (4): 625–641.
- 968 Kay, Kendrick N., and Jason D. Yeatman. 2017. “Bottom-up and Top-down  
969 Computations in Word-and Face-Selective Cortex.” *Elife* 6: e22341.
- 970 Kelly, Simon P., and Redmond G. O’Connell. 2013. “Internal and External Influences on  
971 the Rate of Sensory Evidence Accumulation in the Human Brain.” *Journal of*  
972 *Neuroscience* 33 (50): 19434–19441.
- 973 Kietzmann, Tim C., Courtney J. Spoerer, Lynn Sörensen, Radoslaw M. Cichy, Olaf  
974 Hauk, and Nikolaus Kriegeskorte. 2019. “Recurrence Required to Capture the Dynamic  
975 Computations of the Human Ventral Visual Stream.” *ArXiv Preprint ArXiv:1903.05946*.
- 976 Kramer, Robin SS, Andrew W. Young, and A. Mike Burton. 2018. “Understanding Face  
977 Familiarity.” *Cognition* 172: 46–58.
- 978 Lamme, Victor AF, and Pieter R. Roelfsema. 2000. “The Distinct Modes of Vision  
979 Offered by Feedforward and Recurrent Processing.” *Trends in Neurosciences* 23 (11):  
980 571–579.
- 981 Lamme, Victor AF, Karl Zipser, and Henk Spekreijse. 2002. “Masking Interrupts Figure-  
982 Ground Signals in V1.” *Journal of Cognitive Neuroscience* 14 (7): 1044–1053.

- 983 Landi, Sofia M., and Winrich A. Freiwald. 2017. "Two Areas for Familiar Face  
984 Recognition in the Primate Brain." *Science* 357 (6351): 591–595.
- 985 Lee, Tai Sing, and David Mumford. 2003. "Hierarchical Bayesian Inference in the Visual  
986 Cortex." *JOSA A* 20 (7): 1434–1448.
- 987 Leibenluft, Ellen, M. Ida Gobbi, Tara Harrison, and James V. Haxby. 2004. "Mothers'  
988 Neural Activation in Response to Pictures of Their Children and Other Children."  
989 *Biological Psychiatry* 56 (4): 225–232.
- 990 Mechelli, Andrea, Cathy J. Price, Karl J. Friston, and Almit Ishai. 2004. "Where  
991 Bottom-up Meets Top-down: Neuronal Interactions during Perception and Imagery."  
992 *Cerebral Cortex* 14 (11): 1256–1265.
- 993 Mognon, Andrea, Jorge Jovicich, Lorenzo Bruzzone, and Marco Buiatti. 2011.  
994 "ADJUST: An Automatic EEG Artifact Detector Based on the Joint Use of Spatial and  
995 Temporal Features." *Psychophysiology* 48 (2): 229–240.
- 996 Mohsenzadeh, Yalda, Sheng Qin, Radoslaw M. Cichy, and Dimitrios Pantazis. 2018.  
997 "Ultra-Rapid Serial Visual Presentation Reveals Dynamics of Feedforward and  
998 Feedback Processes in the Ventral Visual Pathway." *Elife* 7: e36329.
- 999 Pelli, Denis G. 1997. "The VideoToolbox Software for Visual Psychophysics:  
1000 Transforming Numbers into Movies." *Spatial Vision* 10 (4): 437–442.
- 1001 Philiastides, Marios G., and Paul Sajda. 2006. "Temporal Characterization of the Neural  
1002 Correlates of Perceptual Decision Making in the Human Brain." *Cerebral Cortex* 16 (4):  
1003 509–518.
- 1004 Philiastides, Marios G., Roger Ratcliff, and Paul Sajda. 2006. "Neural Representation of  
1005 Task Difficulty and Decision Making during Perceptual Categorization: A Timing  
1006 Diagram." *Journal of Neuroscience* 26 (35): 8965–8975.
- 1007 Praß, Maren, Cathleen Grimsen, Martina König, and Manfred Fahle. 2013. "Ultra Rapid  
1008 Object Categorization: Effects of Level, Animacy and Context." *PLoS One* 8 (6).

- 1009 Pratte, Michael S., Sam Ling, Jascha D. Swisher, and Frank Tong. 2013. “How  
1010 Attention Extracts Objects from Noise.” *Journal of Neurophysiology* 110 (6): 1346–1356.
- 1011 Ramon, Meike, and Maria Ida Gobbi. 2018. “Familiarity Matters: A Review on  
1012 Prioritized Processing of Personally Familiar Faces.” *Visual Cognition* 26 (3): 179–195.
- 1013 Ramon, Meike, Luca Vizioli, Joan Liu-Shuang, and Bruno Rossion. 2015. “Neural  
1014 Microgenesis of Personally Familiar Face Recognition.” *Proceedings of the National  
1015 Academy of Sciences* 112 (35): E4835–E4844.
- 1016 Ress, David, Benjamin T. Backus, and David J. Heeger. 2000. “Activity in Primary  
1017 Visual Cortex Predicts Performance in a Visual Detection Task.” *Nature Neuroscience* 3  
1018 (9): 940–945.
- 1019 Schweinberger, Stefan R., Esther C. Pickering, Ines Jentzsch, A. Mike Burton, and  
1020 Jürgen M. Kaufmann. 2002. “Event-Related Brain Potential Evidence for a Response of  
1021 Inferior Temporal Cortex to Familiar Face Repetitions.” *Cognitive Brain Research* 14 (3):  
1022 398–409.
- 1023 Shadlen, Michael N., and William T. Newsome. 2001. “Neural Basis of a Perceptual  
1024 Decision in the Parietal Cortex (Area LIP) of the Rhesus Monkey.” *Journal of  
1025 Neurophysiology* 86 (4): 1916–1936.
- 1026 Spacek, Martin A., Gregory Born, Davide Crombie, Steffen A. Katzner, and Laura  
1027 Busse. 2019. “Robust Effects of Cortical Feedback on Thalamic Firing Mode during  
1028 Naturalistic Stimulation.” *BioRxiv*, 776237.
- 1029 Sugiura, Motoaki, Carlos Makoto Miyauchi, Yuka Kotozaki, Yoritaka Akimoto, Takayuki  
1030 Nozawa, Yukihiro Yomogida, Sugiko Hanawa, Yuki Yamamoto, Atsushi Sakuma, and  
1031 Seishu Nakagawa. 2015. “Neural Mechanism for Mirrored Self-Face Recognition.”  
1032 *Cerebral Cortex* 25 (9): 2806–2814.
- 1033 Summerfield, Jennifer J., Jöran Lepsien, Darren R. Gitelman, M. Marsel Mesulam, and  
1034 Anna C. Nobre. 2006. “Orienting Attention Based on Long-Term Memory Experience.”  
1035 *Neuron* 49 (6): 905–916.



- 1036 Supèr, Hans, Henk Spekreijse, and Victor AF Lamme. 2001. “Two Distinct Modes of  
1037 Sensory Processing Observed in Monkey Primary Visual Cortex (V1).” *Nature*  
1038 *Neuroscience* 4 (3): 304–310.
- 1039 Taylor, Margot J., Marie Arsalidou, Sarah J. Bayless, Drew Morris, Jennifer W. Evans,  
1040 and Emmanuel J. Barbeau. 2009. “Neural Correlates of Personally Familiar Faces:  
1041 Parents, Partner and Own Faces.” *Human Brain Mapping* 30 (7): 2008–2020.
- 1042 Visconti, M. di Oleggio Castello, and M. I. Gobbini. 2015. “Familiar Face Detection in  
1043 180 Ms.” *PloS One* 10 (8): e0136548–e0136548.
- 1044 Woolgar, Alexandra, Adam Hampshire, Russell Thompson, and John Duncan. 2011.  
1045 “Adaptive Coding of Task-Relevant Information in Human Frontoparietal Cortex.”  
1046 *Journal of Neuroscience* 31 (41): 14592–14599.
- 1047 Woolgar, Alexandra, Soheil Afshar, Mark A. Williams, and Anina N. Rich. 2015.  
1048 “Flexible Coding of Task Rules in Frontoparietal Cortex: An Adaptive System for  
1049 Flexible Cognitive Control.” *Journal of Cognitive Neuroscience* 27 (10): 1895–1911.
- 1050 Young, Andrew W., and A. Mike Burton. 2018. “Are We Face Experts?” *Trends in*  
1051 *Cognitive Sciences* 22 (2): 100–110.
- 1052
- 1053
- 1054
- 1055
- 1056
- 1057

## 1058 Supplementary Materials

1059

1060 Low-level image statistics do not explain the separation of familiar from  
1061 unfamiliar faces

1062         Although, we did equalize the frequency content, pixel intensities and contrast of  
1063 the images of our dataset (see *methods*), but we checked whether there are other low-  
1064 level differences by creating a model representational dissimilarity matrix (RDM) for each  
1065 of the categories under different phrase coherences. Briefly, *neural* RDMs are  
1066 constructed by calculating the correlations (or dissimilarities) of the *brain* response to  
1067 different face stimuli to give an abstract representation of information encoding in the  
1068 brain. We also construct a *low-level feature* RDM, for which we calculate the correlations  
1069 between images corresponding to each brain response. *Model* RDMs *predicted*  
1070 representations in the brain (see *Methods*). The model RDMs were created for  
1071 discriminating (1) familiar from unfamiliar (Supplementary Figure 1A) and also (2) the  
1072 familiarity levels from one another (Supplementary Figure 1B). We then computed partial  
1073 Spearman's correlations between one of the models and neural RDMs for every time  
1074 point and participant, while partialling out (Supplementary Figure 1)/not partialling out  
1075 (Supplementary Figure 2) low-level feature model RDM .

1076         This analysis revealed the emergence of familiarity representation (familiar vs.  
1077 unfamiliar faces) at around 270 ms post-stimulus for the highest coherence level (55%,  
1078 Supplementary Figure 1A). The onset of significant representation is slightly later for  
1079 lower coherence levels (e.g., 45%, Supplementary Figure 1A), which may suggest the  
1080 need for additional processing time required to evaluate the sensory evidence.  
1081 Interestingly, while the dynamics of familiarity level representations also showed gradual  
1082 accumulation of information (Supplementary Figure 1B), especially for the 45% and 55%  
1083 coherence, the correlation values are generally higher for the model of familiarity level  
1084 compared to familiar-unfamiliar (c.f. Supplementary Figure 1A). This suggests that there  
1085 might be well-established neural mechanisms in the brain that discriminate levels of

1086 familiarity so strongly that is not suppressed/dominated by the task (i.e. here familiar-  
 1087 unfamiliar) or the response of the participants. This could also be supported by the  
 1088 observation that, as opposed to the familiar-unfamiliar representations, for which the 55%  
 1089 coherence provided the most information (at least in the stimulus-aligned analysis), the  
 1090 familiarity level representations provided their highest information in lower coherence  
 1091 levels such as 45% (in both stimulus- and response-aligned analyses) and 30% or even  
 1092 22% in the response-aligned analysis. Note that participants' task and response could  
 1093 have also potentially contributed to the analysis of face familiarity model as those factors  
 1094 matched the familiar-unfamiliar model used in Supplementary Figure 1A.

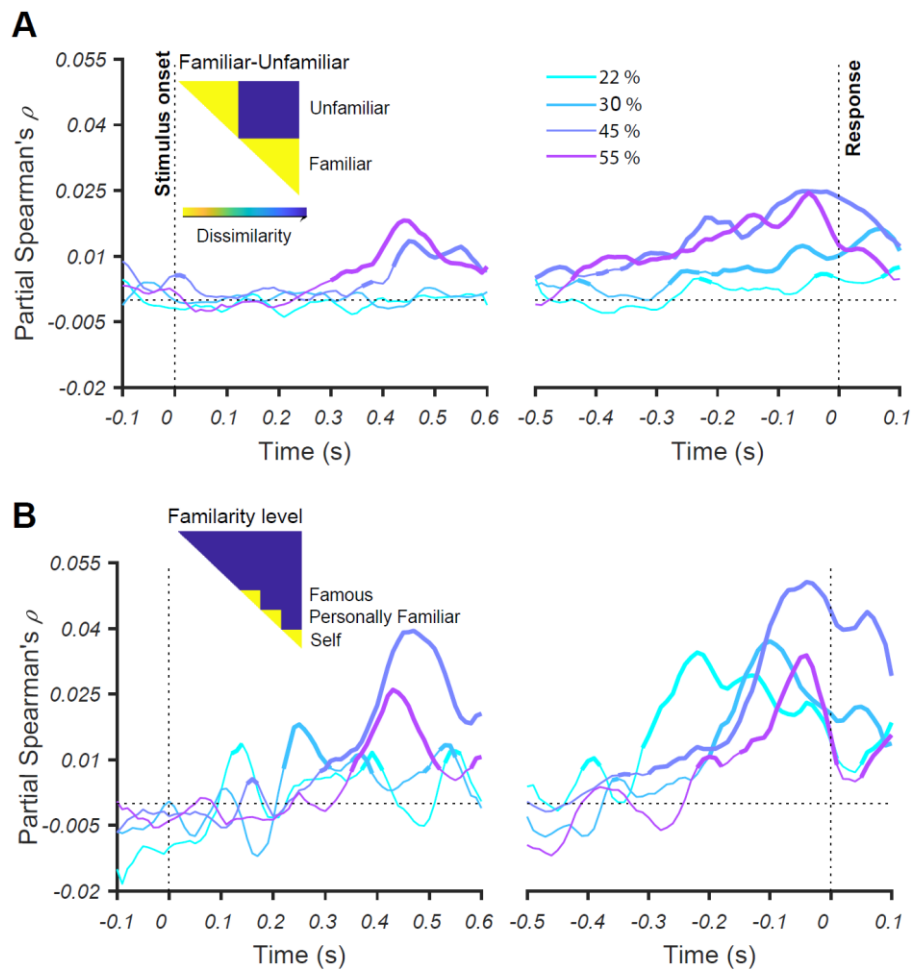

1095

1096 **Supplementary Figure 1. Representations of face familiarity and categories revealed by RSA.** Time  
 1097 course of Spearman's correlations between neural RDMs and model RDM (shown as insets) for (A) face  
 1098 familiarity; and (B) face familiarity levels, famous, self and personally familiar faces, after partialling out  
 1099 contributions from low-level features (see Methods). Each colored trace shows the correlations over time  
 1100 for one phase coherence level. Thickened lines indicate time points where the correlation is significant (sign  
 1101 permutation test, FDR-corrected significance level at  $p < 0.05$ ), and black horizontal dotted lines indicate 0

1102 correlation. The left panels show the results for stimulus-aligned analysis while the right panels represent  
1103 the results for response-aligned analysis.

1104

1105 Apart from a small difference in absolute decoding rates, the dynamics of neural  
1106 representations were similar when not partialling out the low-level feature model RDM  
1107 (Supplementary Figure 2), presenting the ramping up of information, with earlier and most  
1108 mounting trends for highest coherence levels (i.e. 45% and 55%). The similar patterns of  
1109 neural information decoding between the correlation patterns with and without the low-  
1110 level feature model suggest that low-level image statistics may only play a minor role in  
1111 driving the observed decoding analyses. Nonetheless, we partialled out the low-level  
1112 feature model in all the following RSA-based analyses to avoid their potential contribution  
1113 to the results.

1114

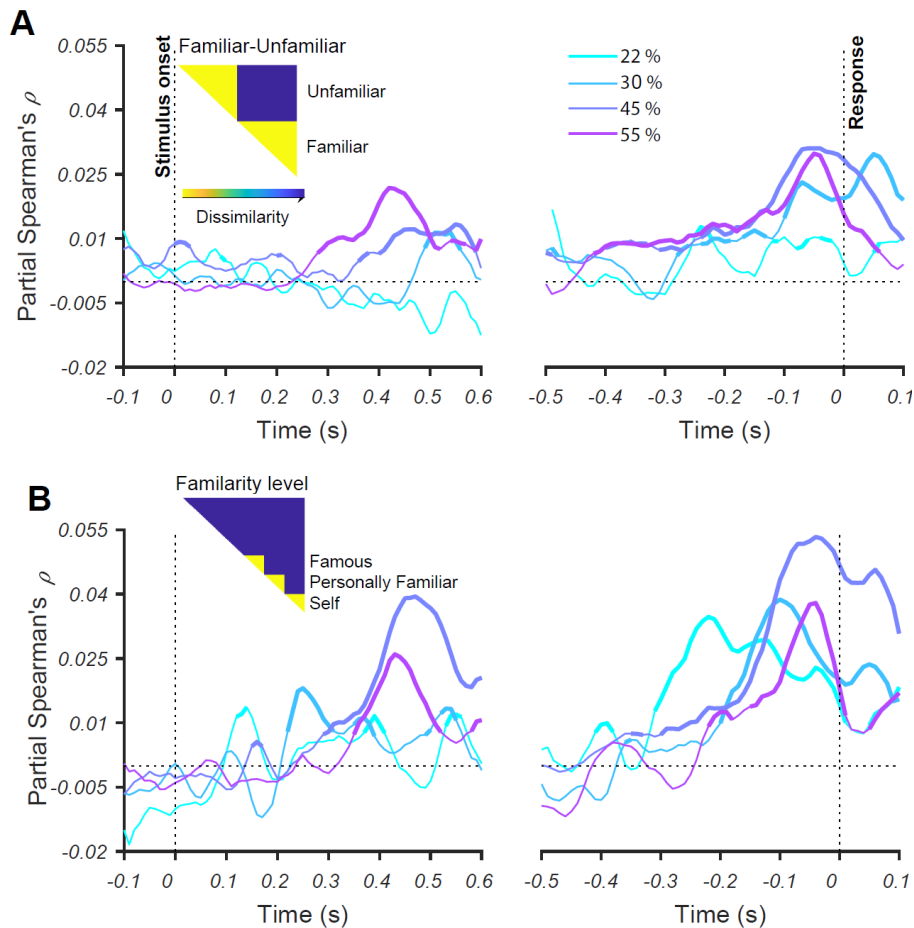

1115

1116 **Supplementary Figure 2. Representations of face familiarity and categories revealed by RSA.** Time  
1117 course of Spearman's correlations between neural RDMs and model RDM (shown as insets) for (A) face  
1118 familiarity; and (B) face familiarity levels, famous, self and personally familiar faces, before partialling out  
1119 contributions from low-level features (see Methods). Each colored trace shows the correlations over time  
1120 for one phase coherence level. Thickened lines indicate time points where the correlation is significant (sign  
1121 permutation test, FDR-corrected significance level at  $p < 0.05$ ), and black horizontal dotted lines indicate 0  
1122 correlation. The left panels show the results for stimulus-aligned analysis while the right panels represent  
1123 the results for response-aligned analysis. Note that the correlation values are higher compared to the results  
1124 after partialling out contributions from low-level features (see Supplementary Figure 1).
